# Supplementary material for: Screening of Bacteriophage Encoded Toxic Proteins with a Next Generation Sequencing-Based Assay
Source: MDPI journal article supplement (doi:10.3390/v13050750), 2021-04-24
Supplement: s1 [file s1]

## Supplementary Materials

# Screening of bacteriophage encoded toxic proteins with a next generation sequencing based assay

Jutta Kasurinen<sup>1</sup>, Cindy M. Spruit<sup>1,†</sup>, Anu Wicklund<sup>1,2</sup>, Maria I. Pajunen<sup>1,‡</sup>, and Mikael Skurnik<sup>1,2,\*,§</sup>

<sup>1</sup> Department of Bacteriology and Immunology, Medicum, Human Microbiome Research Program, Faculty of Medicine, University of Helsinki, 00290 Helsinki, Finland; jutta.kasurinen@helsinki.fi (J.K.), c.m.spruit@uu.nl (C.M.S.); anumaria.wicklund@gmail.com (A.W.); maria.pajunen@helsinki.fi (M.I.P.); mikael.skurnik@helsinki.fi (M.S)

<sup>2</sup> Division of Clinical Microbiology, HUSLAB, University of Helsinki and Helsinki University Hospital, 00290 Helsinki, Finland

<sup>†</sup> Present address: Department of Chemical Biology & Drug Discovery, Utrecht Institute for Pharmaceutical Sciences, Utrecht University, 3584 CG Utrecht, the Netherlands

<sup>‡</sup> Shared senior authorship

<sup>\*</sup> Correspondence: mikael.skurnik@helsinki.fi; Tel.: +358 50 3360981

## Supplementary Figures

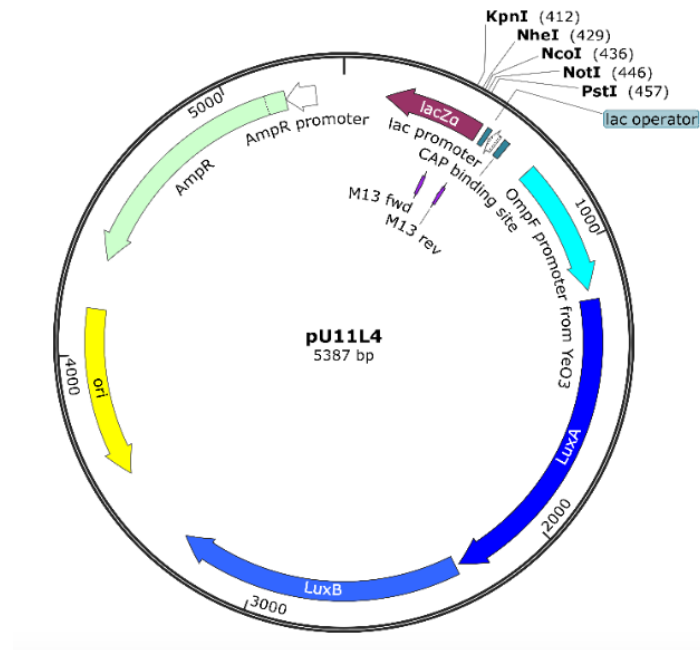

Figure S1. Map of plasmid pU11L4 [1].

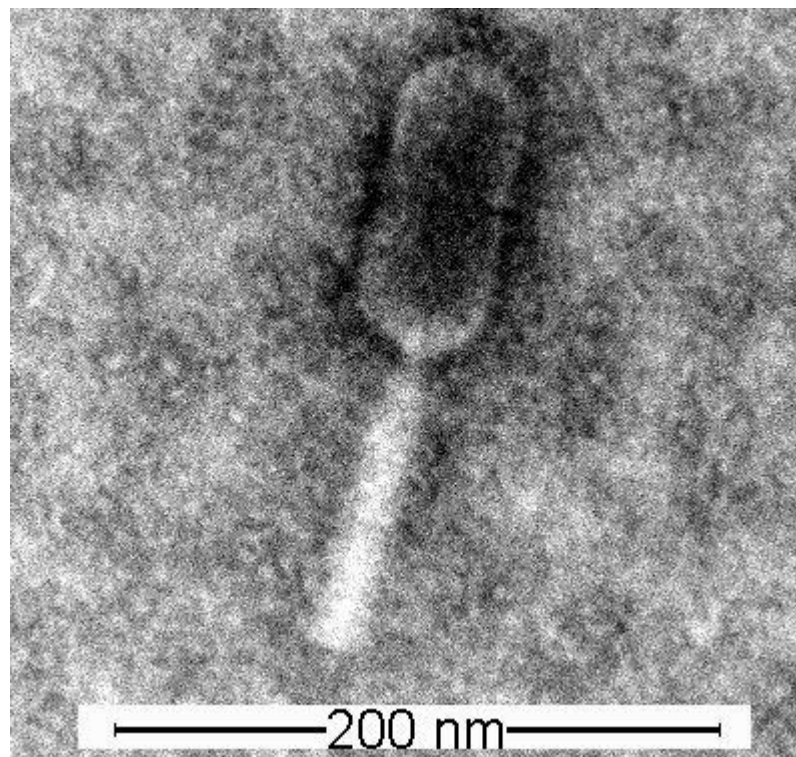

**Figure S2.** Transmission electron micrograph of a negatively stained fHy-Eco03 particle (capsid length 86 nm, tail length 103 nm, phage length 208 nm).

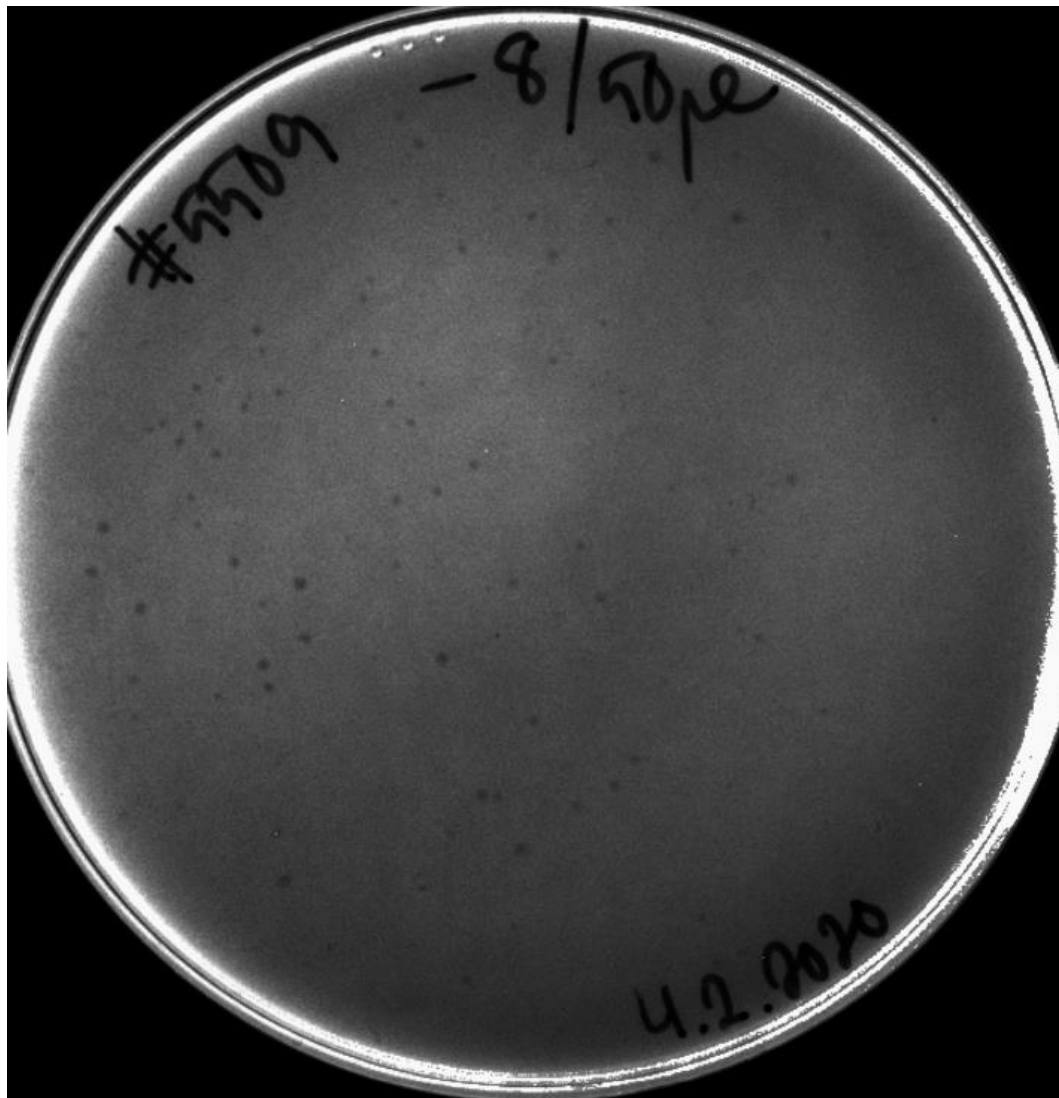

**Figure S3.** Plaque morphology of *Escherichia coli* strain #5509 infected with fHy-Eco03.

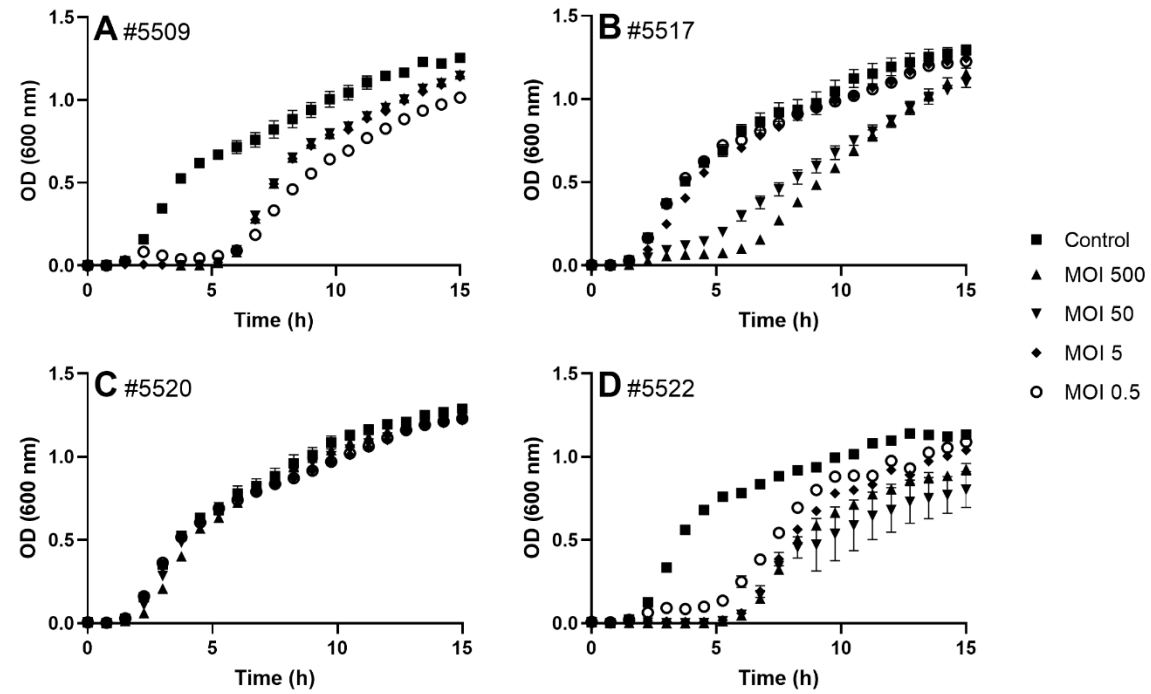

**Figure S4.** Growth curves of *Escherichia coli* strains #5509 (A), #5517 (B), #5520 (C), and #5522 (D) infected with fHy-Eco03. Bacteria were cultured in liquid LB medium at 37°C with different initial multiplicities of infections (MOIs). Each data point represents the average OD<sub>600</sub> for three to four replicates and error bars represent the standard deviation (SD).

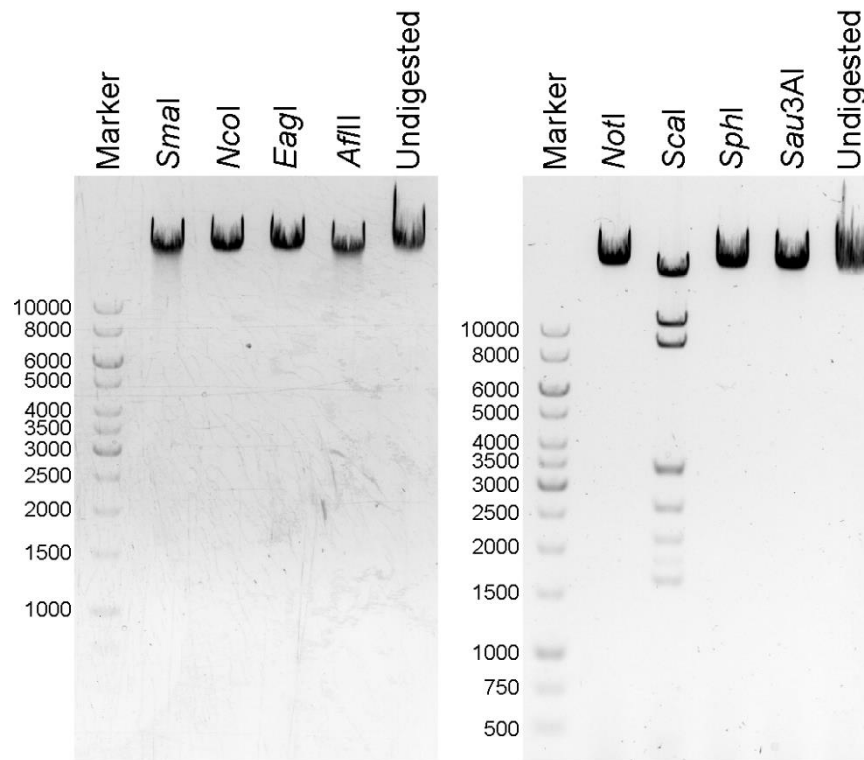

**Figure S5.** Restriction enzyme digestion analysis of fHy-Eco03 DNA. The DNA was digested with restriction endonucleases *AflIII*, *EagI*, *NcoI*, *NotI*, *Sau3AI*, *ScaI*, *SmaI*, and *SphI* and the digested samples were loaded to the gel as indicated, along with undigested phage DNA and 1 kb DNA ladder (Marker). The *in silico* ScaI-digested genomic sequence gives the following fragments (bp): 24,830; 10,405; 8,539; 3,337; 3,260 (left end); 2,531; 2,074; 1,596; 439 (right end). For the used restriction enzymes, the numbers of predicted recognition sites in the genome are as follows:

| Enzyme        | Recognition sequence | <i>n</i> sites | Methylation sensitivity / dependence<br>( <a href="https://enzymefinder.neb.com/">https://enzymefinder.neb.com/</a> ) |
|---------------|----------------------|----------------|-----------------------------------------------------------------------------------------------------------------------|
| <i>AflIII</i> | CTTAAG               | 10             | None/None                                                                                                             |
| <i>EagI</i>   | CGGCCG               | 5              | CpG blocked/None                                                                                                      |
| <i>NcoI</i>   | CCATGG               | 7              | None/None                                                                                                             |
| <i>NotI</i>   | GCGGCCGC             | 1              | CpG variable/None                                                                                                     |
| <i>Sau3AI</i> | GATC                 | 9              | Some block/None                                                                                                       |
| <i>ScaI</i>   | AGTACT               | 8              | EcoBI: blocked/None                                                                                                   |
| <i>SmaI</i>   | CCCGGG               | 3              | CpG blocked/None                                                                                                      |
| <i>SphI</i>   | GCATGC               | 14             | EcoBI: blocked/None                                                                                                   |

## fHyEco PhageTerm Analysis

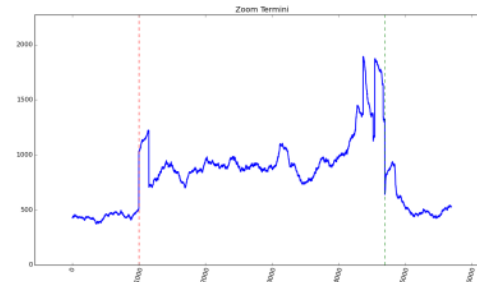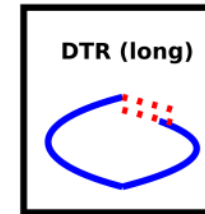

### PhageTerm Method

| Ends      | Left (red) | Right (green) | Permuted | Orientation | Class      | Type |
|-----------|------------|---------------|----------|-------------|------------|------|
| Redundant | 47595      | 51293         | No       | NA          | DTR (long) | T5   |

\*Direct Terminal Repeats: 3699 bp

| Strand | Location | T    | pvalue    | T (Start. Pos. Cov. / Whole Cov.) |
|--------|----------|------|-----------|-----------------------------------|
| +      | 47595    | 0.66 | 1.47e-114 |                                   |
|        | 51118    | 0.40 | 2.11e-26  |                                   |
|        | 41280    | 0.10 | 1.30e-04  |                                   |
|        | 23058    | 0.06 | 1.00e+00  |                                   |
|        | 33934    | 0.06 | 2.11e-01  |                                   |
| -      | 51293    | 0.68 | 1.03e-195 |                                   |
|        | 51117    | 0.59 | 3.89e-149 |                                   |
|        | 51453    | 0.07 | 1.67e-07  |                                   |
|        | 35956    | 0.06 | 9.95e-01  |                                   |
|        | 23478    | 0.06 | 1.00e+00  |                                   |

**Figure S6.** Detection of genome ends of fHy-Eco03. PhageTerm output (according to the PhageTerm method) showing major peaks in the ends of the genome on both positive and negative strands.

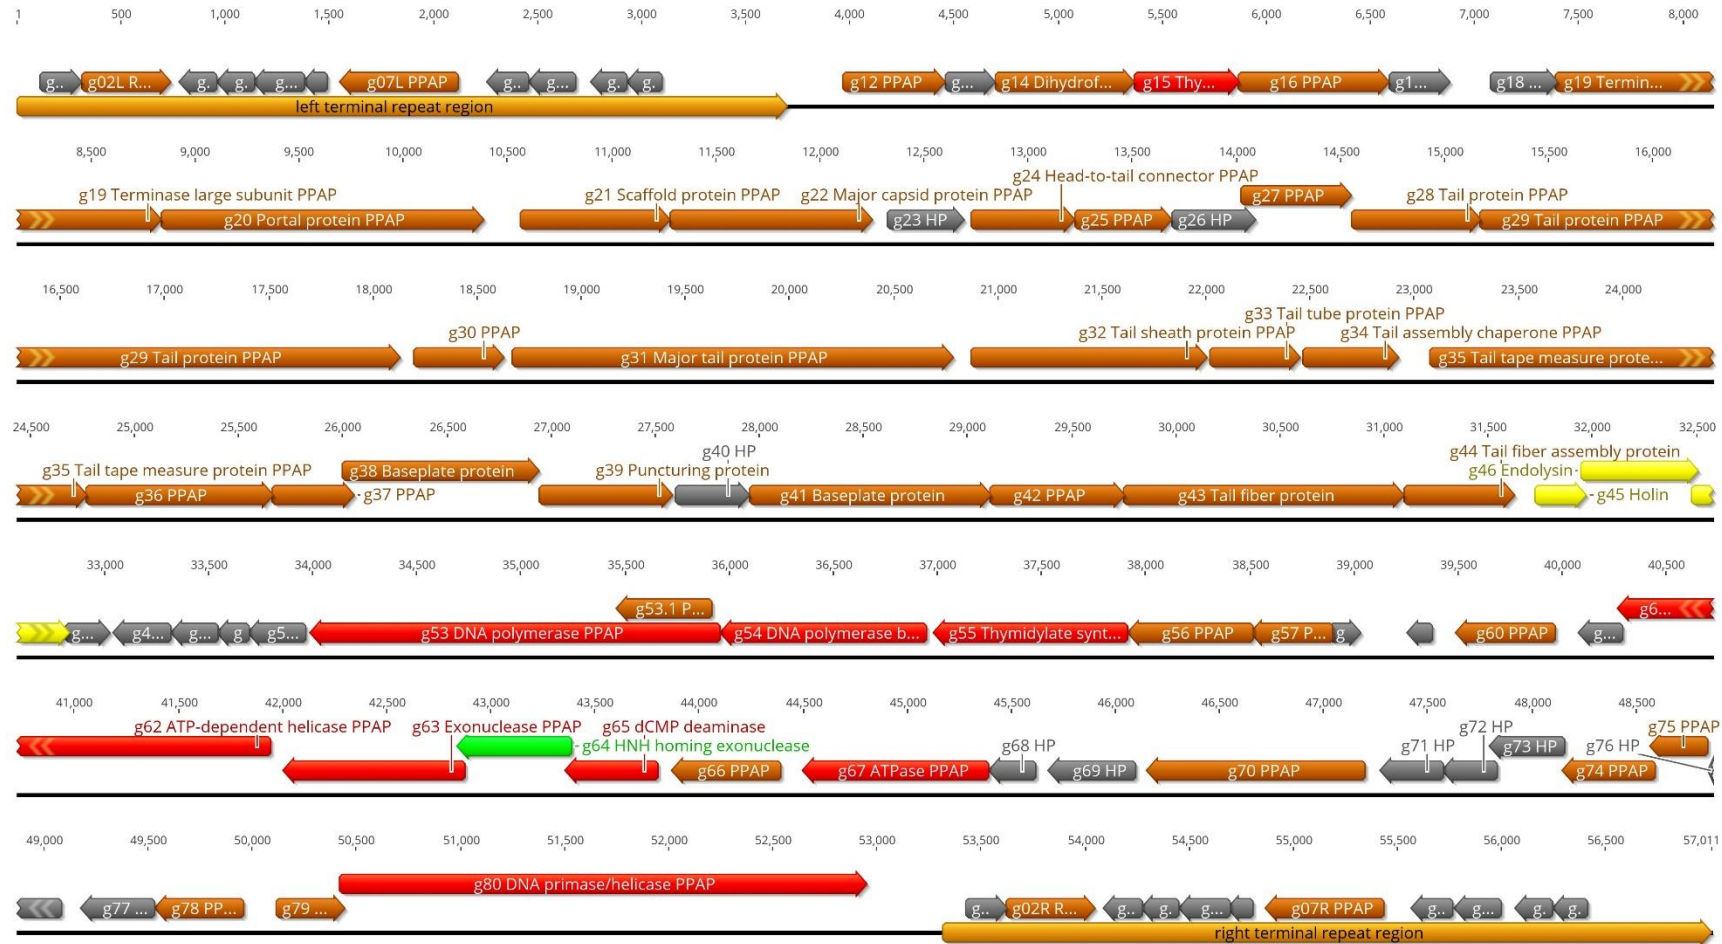

**Figure S7.** Genomic map of fHy-Eco03. Geneious Prime (version 2021.0.3) program was used for visualization. The genes encoding structural or phage particle associated proteins (PPAPs) are drawn in brown, nucleic acid metabolism associated enzymes in red, cell lysis associated proteins in yellow, endonuclease in green, and hypothetical proteins in grey. PPAP, phage particle associated protein; HP, hypothetical protein.



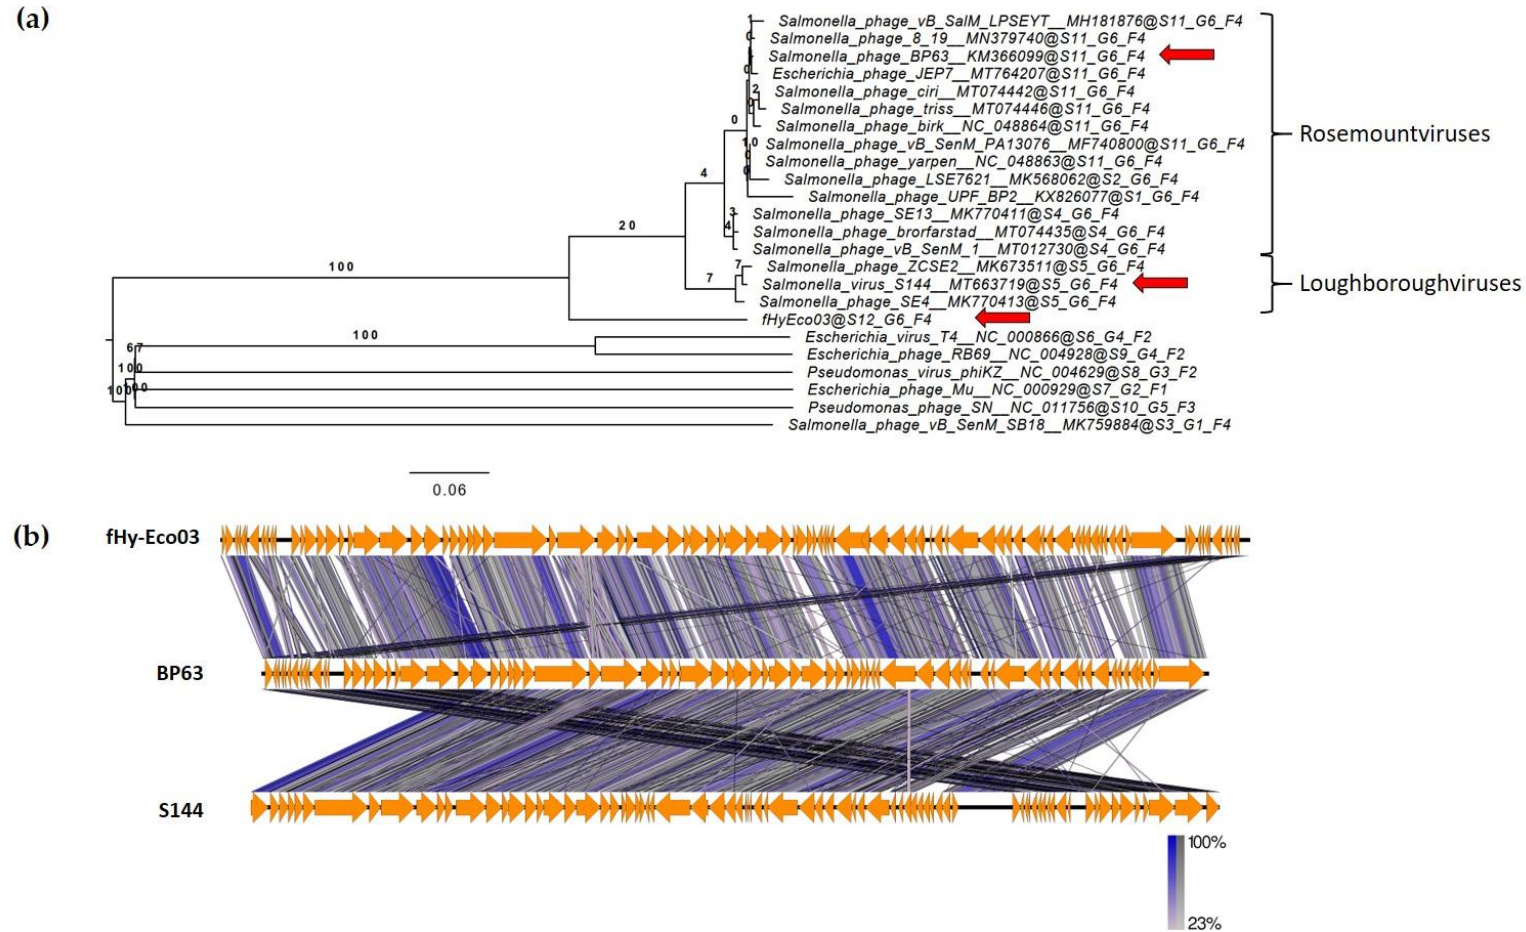

**Figure S8.** Genomic comparison of fHy-Eco03 (a) The phylogenetic genome-BLAST distance phylogeny (GBDP-D0) using VICTOR tool. Salmonella phage BP63 is the type phage for Rosemountviruses, and Salmonella phage ZCSE2 is the type phage for Loughboroughviruses, present in the ICTV virus taxonomy (release 2019). Some additional Myoviruses, especially those identified in the HHPRED analysis (Table S2) were included in the analysis. (b) An EasyFig generated comparison of the genomes of phages fHy-Eco03 (top), BP63 (middle) and S144 (bottom), indicated in panel (a) with red arrows, with different shades of blue indicating the identities between the genomes.

## Supplementary Tables

**Table S1.** *Escherichia coli* strains used to determine the host range of fHy-Eco03. All the *E. coli* strains were isolated from human patient samples at the Clinical Microbiology Laboratory of the hospital district of Helsinki and Uusimaa, Finland. The Skurnik laboratory strain collection storage numbers are shown. Strains that produce extended-spectrum beta-lactamase (ESBL) are indicated. Strains that were infected by phage fHy-Eco03 are indicated as follows: ++, clear strong lysis; +/-, lysis but low EOP; -, no infection. The sensitivity of the strains indicated **in bold** to fHy-Eco03 was confirmed by determining infection growth curves using the Bioscreen C incubator (see Figure S4).

| Storage #   | Strain   | Origin             | Antibiotic resistance | Sensitivity to fHy-Eco03 |
|-------------|----------|--------------------|-----------------------|--------------------------|
| 5506        | 123794   | Blood              |                       | –                        |
| 5507        | 123789   | Blood              |                       | –                        |
| <b>5509</b> | 123781   | Blood              |                       | ++                       |
| 5510        | 123780   | Blood              |                       | –                        |
| 5512        | 123770   | Blood              |                       | –                        |
| <b>5517</b> | 123745   | Blood              |                       | ++                       |
| 5519        | 123741   | Blood              |                       | –                        |
| <b>5520</b> | 123740   | Blood              |                       | +/- Turbid plaques       |
| 5521        | 123738   | Blood              |                       | –                        |
| <b>5522</b> | 123734   | Blood              |                       | Turbid plaques           |
| 5625        | 13ME7768 | Appendix abscess   |                       | –                        |
|             | ME07799  | Gall bladder fluid |                       | –                        |
| 5641        | UB14789  | Urine              |                       | –                        |
| 5768        | 13MD3432 | Rectal secretion   | ESBL                  | –                        |
|             | UB15006  | Urine              | ESBL                  | –                        |
|             | KK08907  | Amniotic fluid     |                       | –                        |
|             | KK08908  | Sacrum wound       |                       | –                        |
|             | KP09927  | Surgical wound     |                       | –                        |
|             | UC14791  | Urine              | ESBL                  | –                        |

|      |           |                          |      |                |
|------|-----------|--------------------------|------|----------------|
| 5626 | UF0545    | Urine                    | ESBL | –              |
| 5759 | EL3622    | Feces                    | ESBL | Turbid plaques |
| 5760 | EL3615    | Feces                    | ESBL | Turbid plaques |
| 5761 | W6215     | Blood                    | ESBL | Turbid plaques |
| 5762 | EL3628    | Feces                    | ESBL | –              |
| 5763 | UC14886   | Urine                    | ESBL | –              |
| 5764 | UD14891   | Urine                    | ESBL | –              |
|      | KP09910   | Abscess                  |      | –              |
| 5627 | UC 14827  | Urine                    | ESBL | –              |
| 5628 | UE14765   | Secretion                | ESBL | –              |
| 5765 | UF05451   | Urine                    | ESBL | –              |
| 5629 | ME8280    | Abdominal puncture       |      | –              |
| 5766 | 13KP10517 | Abscess in gluteal cleft |      | –              |
| 5767 | 13KP10501 | Foot surgical wound      |      | –              |
| 5630 | TS07654   | Thigh wound              |      | –              |
| 5631 | KK4340    | Foot sole wound          |      | –              |
| 5632 | UB15026   | Rectum mucus             | ESBL | –              |
|      | UB15626   | Urine, catheter          | ESBL | –              |
|      | TS7670    | Surgical wound           |      | –              |
| 5633 | EL3851    | Rectum mucus             | ESBL | –              |
| 5634 | MD3414    | Rectum mucus             | ESBL | –              |
| 5635 | UA15942   | Urine                    | ESBL | –              |
|      | UA16057   | Urine                    | ESBL | Turbid plaques |
|      | UB15620   | Urine                    | ESBL | –              |
| 5636 | UB15822   | Urine                    | ESBL | Turbid plaques |

|      |         |              |      |                |
|------|---------|--------------|------|----------------|
|      | UD15570 | Urine        | ESBL | –              |
|      | UE15406 | Urine        | ESBL | –              |
|      | EL3867  | Rectum mucus | ESBL | Turbid plaques |
| 5637 | EL3870  | Feces        | ESBL | Turbid plaques |
| 5638 | EL3873  | Rectum mucus | ESBL | –              |
| 5639 | EL3875  | Urine        | ESBL | –              |

**Table S2.** Annotation of the predicted gene products of fHy-Eco03. The genes, gene location, gene size, and protein length are listed. LC-MS/MS analysis was performed to identify phage particle associated proteins (PPAPs). The best HHpred hits (with a probability above 50% and E-value below 1) are included [2]. A BLASTP search against the non-redundant protein sequences database (release update from February 6, 2021) was performed for every predicted gene product and the two results with the lowest E-values were recorded including query coverage, amino acid identity, and the accession numbers of the closest homologs. Note that due to the 3229 bp terminal repeats genes *g01* – *g11R* have two genomic locations. The fHy-Eco03 genome sequence with annotation has been deposited in the NCBI nucleotide database (GenBank) under accession number MW602648.

| fHy-Eco03 genome features |                |              |                |                   |      | The best HHpred hits<br>(Probability percentage/E-value)                                                 | BLASTP analysis                                                    |                  |         |                       |                  |
|---------------------------|----------------|--------------|----------------|-------------------|------|----------------------------------------------------------------------------------------------------------|--------------------------------------------------------------------|------------------|---------|-----------------------|------------------|
| Gene                      | Start position | End position | Gene size (bp) | Protein size (aa) | PPAP |                                                                                                          | The best hits                                                      | Query coverage % | E-value | Amino acid identity % | Accession number |
| <i>g01</i>                | 114            | 311          | 198            | 65                | no   | No significant hits                                                                                      | hypothetical protein zoltan_21 [ <i>Salmonella</i> phage zoltan]   | 93               | 0.007   | 40.32                 | QIN98827.1       |
|                           | 53426          | 53623        |                |                   |      |                                                                                                          | hypothetical protein ciri_21 [ <i>Salmonella</i> phage ciri]       | 93               | 0.007   | 40.32                 | QIN98756.1       |
| <i>g02</i>                | 311            | 736          | 426            | 141               | yes  | 1OB8_B, Holliday-junction resolvase { <i>Saccharolobus solfataricus</i> } (99.6%/1.3*10 <sup>-14</sup> ) | putative resolvase [ <i>Salmonella</i> virus S144]                 | 100              | 2e-77   | 74.26                 | QMV47894.1       |
|                           | 53623          | 54048        |                |                   |      |                                                                                                          | hypothetical protein HOV36_gp57 [ <i>Salmonella</i> phage ZCSE2]   | 100              | 1e-76   | 73.27                 | YP_009821772.1   |
| <i>g03R</i>               | 962            | 777          | 186            | 61                | no   | No significant hits                                                                                      | hypothetical protein triss_20 [ <i>Salmonella</i> phage triss]     | 100              | 8e-34   | 88.52                 | QIN99040.1       |
|                           | 54274          | 54089        |                |                   |      |                                                                                                          | hypothetical protein HWB04_gp70 [ <i>Salmonella</i> phage UPF_BP2] | 100              | 2e-33   | 88.52                 | YP_009831725.1   |
| <i>g04R</i>               | 1138           | 959          | 180            | 59                | no   | No significant hits                                                                                      | hypothetical protein BJD50_gp03 [ <i>Salmonella</i> phage BP63]    | 100              | 7e-36   | 98.31                 | YP_009302922.1   |
|                           | 54450          | 54271        |                |                   |      |                                                                                                          | hypothetical protein JEP7_56 [ <i>Escherichia</i> phage JEP7]      | 100              | 2e-35   | 98.31                 | QOC55413.1       |
| <i>g05R</i>               | 1383           | 1138         | 246            | 81                | no   | No significant hits                                                                                      | hypothetical protein HOV36_gp60 [ <i>Salmonella</i> phage ZCSE2]   | 100              | 2e-39   | 77.78                 | YP_009821775.1   |
|                           | 54695          | 54450        |                |                   |      |                                                                                                          | hypothetical protein HWC20_gp76 [ <i>Salmonella</i> phage SE4]     | 92               | 4e-39   | 82.67                 | YP_009845656.1   |
| <i>g06R</i>               | 1492           | 1373         | 120            | 39                | no   | No significant hits                                                                                      | hypothetical protein [ <i>Salmonella</i> phage 8-19]               | 94               | 1e-08   | 67.57                 | QFR58182.1       |
|                           | 54804          | 54685        |                |                   |      |                                                                                                          | hypothetical protein HWC19_gp07 [ <i>Salmonella</i> phage SE13]    | 97               | 2e-08   | 65.79                 | YP_009845514.1   |
| <i>g07R</i>               | 2122           | 1550         | 573            | 190               | yes  | No significant hits                                                                                      | hypothetical protein HOV36_gp67 [ <i>Salmonella</i> phage ZCSE2]   | 96               | 1e-74   | 63.59                 | YP_009821782.1   |
|                           | 55434          | 54862        |                |                   |      |                                                                                                          | hypothetical protein [ <i>Salmonella</i> virus S144]               | 96               | 3e-74   | 63.04                 | QMV47903.1       |

|      |       |       |      |     |     |                                                                                             |                                                                                   |     |       |       |                |
|------|-------|-------|------|-----|-----|---------------------------------------------------------------------------------------------|-----------------------------------------------------------------------------------|-----|-------|-------|----------------|
| g08R | 2453  | 2253  | 201  | 66  | no  | No significant hits                                                                         | hypothetical protein HOV36_gp63 [ <i>Salmonella</i> phage ZCSE2]                  | 98  | 4e-09 | 41.54 | YP_009821778.1 |
|      | 55765 | 55565 |      |     |     |                                                                                             | hypothetical protein [ <i>Salmonella</i> virus S144]                              | 98  | 5e-09 | 41.54 | QMV47899.1     |
| g09R | 2684  | 2457  | 228  | 75  | no  | No significant hits                                                                         | hypothetical protein brorfarstad_14 [ <i>Salmonella</i> phage brorfarstad]        | 100 | 4e-30 | 66.67 | QIN98305.1     |
|      | 55996 | 55769 |      |     |     |                                                                                             | hypothetical protein vBSenM1_37 [ <i>Salmonella</i> phage vB_SenM-1]              | 100 | 7e-30 | 66.67 | QJQ40037.1     |
| g10R | 2930  | 2754  | 177  | 58  | no  | No significant hits                                                                         | hypothetical protein [ <i>Salmonella</i> virus S144]                              | 100 | 1e-22 | 79.31 | QMV47901.1     |
|      | 56242 | 56066 |      |     |     |                                                                                             | hypothetical protein HWC20_gp71 [ <i>Salmonella</i> phage SE4]                    | 98  | 1e-22 | 82.46 | YP_009845651.1 |
| g11R | 3918  | 4262  | 171  | 56  | no  | No significant hits                                                                         | hypothetical protein HWD20_gp09 [ <i>Salmonella</i> phage birk]                   | 83  | 7e-04 | 38.30 | YP_009857669.1 |
|      | 56412 | 56242 |      |     |     |                                                                                             | hypothetical protein vBSalMLPSEYT_00001 [ <i>Salmonella</i> phage vB_SalM-LPSEYT] | 83  | 0.002 | 38.30 | AWW14697.1     |
| g12  | 4312  | 4461  | 495  | 164 | yes | No significant hits                                                                         | hypothetical protein nenneke_8 [ <i>Salmonella</i> phage nenneke]                 | 98  | 2e-23 | 40.00 | QIN98440.1     |
|      |       |       |      |     |     |                                                                                             | hypothetical protein rivia_8 [ <i>Salmonella</i> phage rivia]                     | 98  | 8e-23 | 38.79 | EBY8042318.1   |
| g13  | 4461  | 4697  | 237  | 78  | no  | No significant hits                                                                         | No significant similarity found                                                   |     |       |       |                |
| g14  | 4697  | 5368  | 672  | 223 | yes | 4PSS_A, Dihydrofolate reductase [ <i>Escherichia coli</i> ] (99.91%/3.9*10 <sup>-23</sup> ) | dihydrofolate reductase [ <i>Salmonella</i> phage vB_SalM-LPSEYT]                 | 100 | 3e-92 | 59.82 | AWW14768.1     |
|      |       |       |      |     |     |                                                                                             | dihydrofolate reductase [ <i>Salmonella</i> phage SE13]                           | 100 | 1e-91 | 59.82 | YP_009845524.1 |
| g15  | 5365  | 5871  | 507  | 168 | no  | 4MQB_B, Thymidylate kinase [ <i>Staphylococcus aureus</i> ] (99.71%/5.5*10 <sup>-15</sup> ) | thymidylate kinase [ <i>Salmonella</i> phage 8-19]                                | 100 | 1e-98 | 80.95 | QFR58193.1     |
|      |       |       |      |     |     |                                                                                             | thymidylate kinase [ <i>Salmonella</i> phage birk]                                | 100 | 3e-98 | 80.95 | YP_009857666.1 |
| g16  | 5868  | 6590  | 723  | 240 | yes | No significant hits                                                                         | hypothetical protein HOV36_gp73 [ <i>Salmonella</i> phage ZCSE2]                  | 95  | 4e-15 | 30.80 | YP_009821788.1 |
| g17  | 6590  | 6880  | 291  | 96  | no  | No significant hits                                                                         | hypothetical protein [ <i>Salmonella</i> virus S144]                              | 100 | 5e-37 | 59.38 | QMV47832.1     |
|      |       |       |      |     |     |                                                                                             | hypothetical protein HOV36_gp74 [ <i>Salmonella</i> phage ZCSE2]                  | 100 | 2e-36 | 58.33 | YP_009821789.1 |
| g18  | 7076  | 7399  | 324  | 107 | no  | No significant hits                                                                         | hypothetical protein HWD20_gp03 [ <i>Salmonella</i> phage birk]                   | 87  | 3e-41 | 72.34 | YP_009857663.1 |
|      |       |       |      |     |     |                                                                                             | hypothetical protein HWC19_gp21 [ <i>Salmonella</i> phage SE13]                   | 87  | 3e-41 | 71.28 | YP_009845528.1 |
|      | 7389  | 8840  | 1452 | 483 | yes |                                                                                             | terminase large subunit [ <i>Salmonella</i> phage SE4]                            | 100 | 0.0   | 83.02 | YP_009845640.1 |

|     |       |       |      |     |     |                                                                                                    |                                                                           |     |        |       |                |
|-----|-------|-------|------|-----|-----|----------------------------------------------------------------------------------------------------|---------------------------------------------------------------------------|-----|--------|-------|----------------|
| g19 |       |       |      |     |     | 3CPE_A, Large terminase, gp17 { <i>Escherichia</i> virus T4} (100%/3.5*10 <sup>-32</sup> )         | hypothetical protein HOV36_gp76 [ <i>Salmonella</i> phage ZCSE2]          | 100 | 0.0    | 82.82 | YP_009821791.1 |
| g20 | 8842  | 10389 | 1548 | 515 | yes | 2JES_K, Portal protein { <i>Bacillus</i> phage SSP1} (99.96%/1.1*10 <sup>-26</sup> )               | portal protein [ <i>Salmonella</i> phage ciri]                            | 99  | 0.0    | 77.80 | QIN98736.1     |
|     |       |       |      |     |     |                                                                                                    | portal protein [ <i>Salmonella</i> phage BP63]                            | 99  | 0.0    | 77.61 | YP_009302940.1 |
| g21 | 10566 | 11282 | 717  | 238 | yes | 21C6_A, Sin Nombre Virus Nucleocapsid Protein (94.9%/0.93)                                         | hypothetical protein HOV36_gp78 [ <i>Salmonella</i> phage ZCSE2]          | 100 | 1e-109 | 81.09 | YP_009821793.1 |
|     |       |       |      |     |     |                                                                                                    | scaffold protein [ <i>Salmonella</i> phage SE4]                           | 99  | 2e-131 | 81.36 | YP_009845638.1 |
| g22 | 11285 | 12253 | 969  | 322 | yes | 6R3A_G, Major capsid protein { <i>Bacillus</i> phage SSP1} (100%/8.3*10 <sup>-37</sup> )           | major capsid protein [ <i>Salmonella</i> phage brunost]                   | 100 | 0.0    | 87.38 | QIN98734.1     |
|     |       |       |      |     |     |                                                                                                    | major capsid protein [ <i>Salmonella</i> phage BP63]                      | 83  | 0.0    | 87.38 | YP_009302942.1 |
| g23 | 12326 | 12694 | 369  | 122 | no  | 5H0M_A, HNH endonuclease { <i>Geobacillus</i> virus E2} (99.17%/3*10 <sup>-11</sup> )              | HNH endonuclease [ <i>Salmonella</i> phage ZCSE2]                         | 95  | 8e-50  | 68.10 | YP_009821717.1 |
|     |       |       |      |     |     |                                                                                                    | hypothetical protein [ <i>Klebsiella</i> phage NL_ZS_3]                   | 95  | 1e-32  | 55.66 | QNN97356.1     |
| g24 | 12730 | 13224 | 495  | 164 | yes | 5A21_D, Head-to-tail interface { <i>Bacillus</i> phage SSP1} (96.05%/0.27)                         | hypothetical protein HWC20_gp56 [ <i>Salmonella</i> phage SE4]            | 100 | 2e-79  | 69.28 | YP_009845636.1 |
|     |       |       |      |     |     |                                                                                                    | putative head-to-tail connector complex 1 [ <i>Salmonella</i> virus S144] | 99  | 4e-78  | 68.07 | QMV47838.1     |
| g25 | 13226 | 13693 | 468  | 155 | yes | No significant hits                                                                                | putative head-to-tail connector complex 2 [ <i>Salmonella</i> virus S144] | 99  | 2e-52  | 52.56 | QMV47839.1     |
|     |       |       |      |     |     |                                                                                                    | hypothetical protein HOV36_gp04 [ <i>Salmonella</i> phage ZCSE2]          | 99  | 3e-52  | 52.56 | YP_009821719.1 |
| g26 | 13695 | 14096 | 402  | 133 | no  | 5A21_F, Head completion protein, gp16 { <i>Bacillus</i> phage SSP1} (97.96%/4.0*10 <sup>-4</sup> ) | hypothetical protein HWC20_gp54 [ <i>Salmonella</i> phage SE4]            | 98  | 4e-52  | 64.89 | YP_009845634.1 |
|     |       |       |      |     |     |                                                                                                    | hypothetical protein HWC19_gp28 [ <i>Salmonella</i> phage SE13]           | 98  | 2e-51  | 64.12 | YP_009845535.1 |
| g27 | 14020 | 14553 | 534  | 177 | yes | 5A21_G, Tail-to-head joining protein, gp17 { <i>Bacillus</i> phage SSP1} (96.59%/0.075)            | hypothetical protein BJD50_gp27 [ <i>Salmonella</i> phage BP63]           | 92  | 8e-60  | 57.67 | YP_009302946.1 |
|     |       |       |      |     |     |                                                                                                    | hypothetical protein HWB04_gp48 [ <i>Salmonella</i> phage UPF_BP2]        | 92  | 2e-59  | 57.06 | YP_009831703.1 |
| g28 | 14556 | 15176 | 621  | 206 | yes | No significant hits                                                                                | hypothetical protein HWD19_gp65 [ <i>Salmonella</i> phage yarpen]         | 97  | 9e-67  | 54.23 | YP_009857656.1 |
|     |       |       |      |     |     |                                                                                                    | putative tail protein 1 [ <i>Salmonella</i> virus S144]                   | 99  | 3e-64  | 54.63 | QMV47842.1     |
| g29 | 15169 | 18132 | 2964 | 987 | yes | No significant hits                                                                                | putative tail protein 2 [ <i>Salmonella</i> virus S144]                   | 98  | 0.0    | 78.32 | QMV47843.1     |
|     |       |       |      |     |     |                                                                                                    | tail protein I [ <i>Salmonella</i> phage ZCSE2]                           | 98  | 0.0    | 78.22 | YP_009821723.1 |

|     |       |       |      |     |     |                                                                                                              |                                                                                   |     |        |       |                |
|-----|-------|-------|------|-----|-----|--------------------------------------------------------------------------------------------------------------|-----------------------------------------------------------------------------------|-----|--------|-------|----------------|
| g30 | 18199 | 18630 | 432  | 143 | yes | 5NGJ_B, Tail tube protein { <i>Escherichia</i> phage T5} (95.2%/0.78)                                        | hypothetical protein [ <i>Pseudobutyrvibrio</i> sp.]                              | 88  | 4e-16  | 44.09 | MBE5909634.1   |
|     |       |       |      |     |     |                                                                                                              | Ig-like domain-containing protein [ <i>Cloacibacillus porcorum</i> ]              | 61  | 7e-16  | 55.06 | WP_168950698.1 |
| g31 | 18670 | 20787 | 2118 | 705 | yes | 4SHS_A, Hoc Head outer capsid protein { <i>Escherichia</i> phage RB69} (96.42%/0.98)                         | hypothetical protein [ <i>Salmonella</i> phage 8-19]                              | 100 | 0.0    | 66.71 | QFR58208.1     |
|     |       |       |      |     |     |                                                                                                              | putative Ig-like domain-containing protein [ <i>Salmonella</i> phage UPF_BP2]     | 100 | 0.0    | 66.85 | YP_009831699.1 |
| g32 | 20874 | 22007 | 1134 | 377 | yes | 3CPE_A, Tail sheath protein, gp18 { <i>Escherichia</i> virus T4} (98.6%/2.4*10 <sup>-5</sup> )               | hypothetical protein HWC19_gp34 [ <i>Salmonella</i> phage SE13]                   | 100 | 0.0    | 75.20 | YP_009845541.1 |
|     |       |       |      |     |     |                                                                                                              | hypothetical protein brorfarstad_62 [ <i>Salmonella</i> phage brorfarstad]        | 100 | 0.0    | 74.93 | QIN98353.1     |
| g33 | 22019 | 22450 | 432  | 143 | yes | 6GKX_ R-type bacteriocin tube protein CD1364 { <i>Clostridium difficile</i> } (97.56%/2.9*10 <sup>-3</sup> ) | hypothetical protein HOV36_gp12 [ <i>Salmonella</i> phage ZCSE2]                  | 99  | 1e-90  | 88.73 | YP_009821727.1 |
|     |       |       |      |     |     |                                                                                                              | DUF3277 domain-containing protein [ <i>Escherichia coli</i> ]                     | 99  | 2e-89  | 88.03 | WP_166428470.1 |
| g34 | 22469 | 22927 | 459  | 152 | yes | No significant hits                                                                                          | hypothetical protein HOV36_gp13 [ <i>Salmonella</i> phage ZCSE2]                  | 97  | 2e-53  | 58.78 | YP_009821728.1 |
|     |       |       |      |     |     |                                                                                                              | hypothetical protein HWC20_gp46 [ <i>Salmonella</i> phage SE4]                    | 97  | 2e-53  | 59.46 | YP_009845626.1 |
| g35 | 23078 | 24769 | 1692 | 563 | yes | 6V8I_AF, Tape measure protein, gp57 { <i>Staphylococcus</i> virus 80alpha} (97.7%/0.2)                       | hypothetical protein brorfarstad_59 [ <i>Salmonella</i> phage brorfarstad]        | 100 | 0.0    | 60.84 | QIN98350.1     |
|     |       |       |      |     |     |                                                                                                              | tail tape measure protein [ <i>Salmonella</i> phage vB_SenM-1]                    | 100 | 0.0    | 61.27 | QJQ40070.1     |
| g36 | 24766 | 25665 | 900  | 299 | yes | No significant hits                                                                                          | hypothetical protein vBSenM1_71 [ <i>Salmonella</i> phage vB_SenM-1]              | 99  | 3e-152 | 72.82 | QJQ40071.1     |
|     |       |       |      |     |     |                                                                                                              | hypothetical protein HWD20_gp61 [ <i>Salmonella</i> phage birk]                   | 99  | 2e-151 | 72.48 | YP_009857721.1 |
| g37 | 25662 | 26054 | 393  | 130 | yes | No significant hits                                                                                          | hypothetical protein HWB04_gp39 [ <i>Salmonella</i> phage UPF_BP2]                | 100 | 2e-59  | 63.85 | YP_009831694.1 |
|     |       |       |      |     |     |                                                                                                              | hypothetical protein BJD50_gp38 [ <i>Salmonella</i> phage BP63]                   | 100 | 3e-59  | 63.08 | YP_009302957.1 |
| g38 | 25996 | 26943 | 948  | 315 | yes | 1WRU_A, Baseplate gp44 { <i>Enterobacteria</i> phage Mu} (99.9%/1.7*10 <sup>-21</sup> )                      | hypothetical protein vBSalMLPSEYT_00050 [ <i>Salmonella</i> phage vB_SalM-LPSEYT] | 98  | 3e-165 | 72.35 | AWW14746.1     |
|     |       |       |      |     |     |                                                                                                              | hypothetical protein BJD50_gp39 [ <i>Salmonella</i> phage BP63]                   | 98  | 5e-165 | 72.35 | YP_009302958.1 |
| g39 | 26945 | 27586 | 642  | 213 | yes |                                                                                                              | hypothetical protein HWD19_gp54 [ <i>Salmonella</i> phage yarpn]                  | 98  | 2e-122 | 78.10 | YP_009857645.1 |



|     |       |       |      |     |     |                                                                                                         |                                                                              |     |        |       |                |
|-----|-------|-------|------|-----|-----|---------------------------------------------------------------------------------------------------------|------------------------------------------------------------------------------|-----|--------|-------|----------------|
|     |       |       |      |     |     | 4RU3_A, Cell puncturing protein gp41 ( <i>Pseudomonas</i> phage SN) (99.9%/1.1*10 <sup>-26</sup> )      | baseplate protein [ <i>Salmonella</i> phage vB_SalM-LPSEYT]                  | 98  | 2e-122 | 78.10 | AWW14745.1     |
| g40 | 27595 | 27954 | 360  | 119 | no  | 5IW9_B, Baseplate wedge protein, gp25 ( <i>Escherichia</i> virus T4) (99.72%/1*10 <sup>-15</sup> )      | hypothetical protein HOV36_gp19 [ <i>Salmonella</i> phage ZCSE2]             | 98  | 4e-65  | 99.25 | YP_009821734.1 |
|     |       |       |      |     |     |                                                                                                         | hypothetical protein HWC20_gp40 [ <i>Salmonella</i> phage SE4]               | 99  | 1e-64  | 98.49 | YP_009845620.1 |
| g41 | 27957 | 29114 | 1158 | 385 | yes | 5HX2_E, Baseplate wedge protein, gp6 ( <i>Escherichia</i> virus T4) (100%/3.5*10 <sup>-30</sup> )       | hypothetical protein brorfartstad_53 [ <i>Salmonella</i> phage brorfartstad] | 100 | 0.0    | 67.44 | QIN98344.1     |
|     |       |       |      |     |     |                                                                                                         | hypothetical protein HWC19_gp43 [ <i>Salmonella</i> phage SE13]              | 100 | 0.0    | 67.18 | YP_009845550.1 |
| g42 | 29107 | 29757 | 651  | 216 | yes | No significant hits                                                                                     | hypothetical protein HOV36_gp21 [ <i>Salmonella</i> phage ZCSE2]             | 100 | 7e-113 | 74.19 | YP_009821736.1 |
|     |       |       |      |     |     |                                                                                                         | hypothetical protein vBSenM1_77 [ <i>Salmonella</i> phage vB_SenM-1]         | 100 | 1e-110 | 73.27 | QJQ40077.1     |
| g43 | 29750 | 31099 | 1350 | 449 | yes | 5YVQ_A, Tail fiber protein S ( <i>Enterobacteria</i> phage Mu) (96.59%/0.004)                           | putative tail fibers protein [ <i>Salmonella</i> phage SE4]                  | 100 | 0.0    | 67.26 | YP_009845617.1 |
|     |       |       |      |     |     |                                                                                                         | tail fiber protein [ <i>Salmonella</i> phage ZCSE2]                          | 100 | 0.0    | 66.82 | YP_009821737.1 |
| g44 | 31096 | 31629 | 534  | 177 | yes | 5YVQ_B, Tail fiber assembly protein U ( <i>Enterobacteria</i> phage Mu) (99.97%/2.2*10 <sup>-29</sup> ) | hypothetical protein HOV36_gp23 [ <i>Salmonella</i> phage ZCSE2]             | 98  | 3e-23  | 98.92 | YP_009821738.1 |
|     |       |       |      |     |     |                                                                                                         | tail fibers protein [ <i>Salmonella</i> phage SE4]                           | 98  | 1e-20  | 96.24 | YP_009845616.1 |
| g45 | 31727 | 31972 | 246  | 81  | yes | No significant hits                                                                                     | hypothetical protein HWC19_gp48 [ <i>Salmonella</i> phage SE13]              | 96  | 9e-23  | 55.95 | YP_009845555.1 |
|     |       |       |      |     |     |                                                                                                         | hypothetical protein vBSenM1_81 [ <i>Salmonella</i> phage vB_SenM-1]         | 96  | 2e-22  | 55.95 | QJQ40081.1     |
| g46 | 31947 | 32510 | 564  | 187 | yes | 2ANV_A, Phage lysozyme ( <i>Salmonella</i> phage P22) (99.81%/6.6*10 <sup>-18</sup> )                   | putative endolysin [ <i>Salmonella</i> virus S144]                           | 97  | 5e-122 | 90.71 | QMV47861.1     |
|     |       |       |      |     |     |                                                                                                         | lysozyme [ <i>Salmonella</i> phage vB_SalM-LPSEYT]                           | 97  | 1e-120 | 90.71 | AWW14736.1     |
| g47 | 32480 | 32830 | 351  | 116 | yes | 4LIN_G, Tail needle protein, gp26 ( <i>Salmonella</i> phage P22) (95.71%/0.5)                           | putative IM-spanin [ <i>Salmonella</i> virus S144]                           | 100 | 6e-37  | 62.07 | QMV47862.1     |
|     |       |       |      |     |     |                                                                                                         | hypothetical protein HOV36_gp27 [ <i>Salmonella</i> phage ZCSE2]             | 100 | 7e-37  | 62.07 | YP_009821742.1 |
| g48 | 32814 | 33029 | 216  | 71  | no  | No significant hits                                                                                     | hypothetical protein rivia_44 [ <i>Salmonella</i> phage rivia]               | 94  | 1e-29  | 74.63 | QIN98547.1     |
|     |       |       |      |     |     |                                                                                                         | hypothetical protein HWD20_gp48 [ <i>Salmonella</i> phage birk]              | 94  | 7e-28  | 73.13 | YP_009857708.1 |

|        |       |        |      |     |     |                                                                                                                       |                                                                            |     |        |       |                |
|--------|-------|--------|------|-----|-----|-----------------------------------------------------------------------------------------------------------------------|----------------------------------------------------------------------------|-----|--------|-------|----------------|
| g49R   | 33320 | 333042 | 279  | 92  | yes | No significant hits                                                                                                   | hypothetical protein HWC19_gp52 [ <i>Salmonella</i> phage SE13]            | 98  | 2e-54  | 89.01 | YP_009845559.1 |
|        |       |        |      |     |     |                                                                                                                       | ryanodine receptor [ <i>Salmonella</i> phage vB_SalM-LPSEYT]               | 98  | 1e-52  | 85.71 | AWW14733.1     |
| g50R   | 33544 | 33320  | 225  | 74  | no  | 4IJJ_B, C4-type zinc finger protein, DksA/TraR family ( <i>Pseudomonas aeruginosa</i> )(99.7%/4.7*10 <sup>-16</sup> ) | hypothetical protein HWC19_gp53 [ <i>Salmonella</i> phage SE13]            | 100 | 5e-42  | 89.19 | YP_009845560.1 |
|        |       |        |      |     |     |                                                                                                                       | DnaK suppressor protein [ <i>Salmonella</i> phage vB_SalM-LPSEYT]          | 100 | 2e-40  | 85.14 | AWW14732.1     |
| g51R   | 33692 | 33537  | 156  | 51  | no  | No significant hits                                                                                                   | No significant similarity found                                            |     |        |       |                |
| g52R   | 33964 | 33689  | 276  | 91  | no  | No significant hits                                                                                                   | hypothetical protein HOV36_gp29 [ <i>Salmonella</i> phage ZCSE2]           | 100 | 4e-49  | 99.51 | YP_009821744.1 |
|        |       |        |      |     |     |                                                                                                                       | hypothetical protein HWC19_gp54 [ <i>Salmonella</i> phage SE13]            | 100 | 3e-41  | 99.35 | YP_009845561.1 |
| g53R   | 35953 | 33986  | 1968 | 655 | yes | 4X0Q_A, DNA polymerase theta ( <i>Homo sapiens</i> )(100%/3.5*10 <sup>-70</sup> )                                     | DNA polymerase [ <i>Salmonella</i> phage vB_SenM_PA13076]                  | 100 | 0.0    | 85.50 | ATI16200.1     |
| g53.1R | 35916 | 35458  | 459  | 152 | yes | No significant hits                                                                                                   | DNA polymerase [ <i>Salmonella</i> phage BP63]                             | 100 | 0.0    | 85.50 | YP_009302972.1 |
| g54R   | 36947 | 35955  | 993  | 330 | no  | 4TR6_B, DNA polymerase III subunit beta ( <i>Bacillus subtilis</i> )(100%/8.9*10 <sup>-43</sup> )                     | DNA polymerase beta subunit [ <i>Salmonella</i> phage LSE7621]             | 99  | 4e-166 | 66.87 | QBJ00954.1     |
|        |       |        |      |     |     |                                                                                                                       | DNA polymerase beta subunit [ <i>Salmonella</i> phage vB_SenM_PA13076]     | 99  | 8e-166 | 66.57 | ATI16199.1     |
| g55R   | 37912 | 36983  | 930  | 309 | yes | 4EZ8_A, Thymidylate synthase ( <i>Mus musculus</i> )(100%/1*10 <sup>-58</sup> )                                       | thymidylate synthase [ <i>Salmonella</i> phage ZCSE2]                      | 100 | 5e-132 | 60.97 | YP_009821747.1 |
|        |       |        |      |     |     |                                                                                                                       | thymidylate synthase [ <i>Salmonella</i> phage SE4]                        | 100 | 2e-128 | 59.03 | YP_009845606.1 |
| g56R   | 38514 | 37912  | 603  | 200 | yes | 3NL9_A, NTP pyrophosphohydrolase ( <i>Exiguobacterium sibiricum</i> )(99.96%/6.9*10 <sup>-29</sup> )                  | hypothetical protein HWC20_gp25 [ <i>Salmonella</i> phage SE4]             | 99  | 4e-91  | 65.66 | YP_009845605.1 |
|        |       |        |      |     |     |                                                                                                                       | hypothetical protein HOV36_gp33 [ <i>Salmonella</i> phage ZCSE2]           | 99  | 4e-90  | 64.14 | YP_009821748.1 |
| g57R   | 38899 | 38501  | 399  | 132 | yes | No significant hits                                                                                                   | hypothetical protein HWB04_gp21 [ <i>Salmonella</i> phage UPF_BP2]         | 100 | 4e-25  | 42.54 | YP_009831676.1 |
|        |       |        |      |     |     |                                                                                                                       | hypothetical protein PA13076_52 [ <i>Salmonella</i> phage vB_SenM_PA13076] | 100 | 6e-25  | 42.54 | ATI16196.1     |
| g58    | 38888 | 39034  | 147  | 48  | no  | No significant hits                                                                                                   | No significant similarity found                                            |     |        |       |                |
| g59R   | 39379 | 39254  | 126  | 41  | no  | No significant hits                                                                                                   | No significant similarity found                                            |     |        |       |                |
| g60R   | 39964 | 39488  | 477  | 158 | yes | No significant hits                                                                                                   | hypothetical protein HWC19_gp60 [ <i>Salmonella</i> phage SE13]            | 82  | 5e-68  | 91.60 | YP_009845567.1 |

|      |        |       |      |     |     |                                                                                                      |                                                                                             |     |        |       |                |
|------|--------|-------|------|-----|-----|------------------------------------------------------------------------------------------------------|---------------------------------------------------------------------------------------------|-----|--------|-------|----------------|
| g61R | 40290  | 40075 | 216  | 71  | no  | No significant hits                                                                                  | hypothetical protein HOV36_gp36 [ <i>Salmonella</i> phage ZCSE2]                            | 97  | 9e-60  | 81.82 | YP_009821751.1 |
|      |        |       |      |     |     |                                                                                                      | hypothetical protein HOV36_gp37 [ <i>Salmonella</i> phage ZCSE2]                            | 100 | 2e-19  | 50.70 | YP_009821752.1 |
|      |        |       |      |     |     |                                                                                                      | hypothetical protein HWC20_gp21 [ <i>Salmonella</i> phage SE4]                              | 100 | 4e-19  | 50.70 | YP_009845601.1 |
| g62R | 41941  | 40268 | 1674 | 557 | yes | 2OCA_A, ATP-dependent helicase, uvsW [ <i>Escherichia</i> virus T4] (100%/2.6*10 <sup>-33</sup> )    | ATP-dependent RNA helicase [ <i>Salmonella</i> phage ZCSE2]                                 | 99  | 0.0    | 84.41 | YP_009821753.1 |
|      |        |       |      |     |     |                                                                                                      | putative ATP-dependent helicase [ <i>Salmonella</i> virus S144]                             | 99  | 0.0    | 84.23 | QMV47876.1     |
| g63R | 42877  | 42005 | 873  | 290 | yes | 3SM4_C, Exonuclease [ <i>Escherichia</i> virus Lambda] (100%/5.3*10 <sup>-11</sup> )                 | hypothetical protein HWC20_gp19 [ <i>Salmonella</i> phage SE4]                              | 98  | 9e-147 | 69.79 | YP_009845599.1 |
|      |        |       |      |     |     |                                                                                                      | hypothetical protein HOV36_gp40 [ <i>Salmonella</i> phage ZCSE2]                            | 98  | 5e-144 | 68.40 | YP_009821755.1 |
| g64R | 43388  | 42840 | 549  | 182 | no  | 1U3E_M, HNH homing endonuclease [ <i>Bacillus</i> virus SPO1] (93.91%/1.6*10 <sup>-12</sup> )        | HNH endonuclease [ <i>Acidibacillus sulfuroxidans</i> ]                                     | 92  | 2e-25  | 41.14 | WP_109431645.1 |
|      |        |       |      |     |     |                                                                                                      | homing endonuclease [ <i>Enterobacteria</i> phage JenK1]                                    | 92  | 4e-25  | 41.14 | YP_009219324.1 |
| g65R | 43806  | 43357 | 450  | 149 | no  | 2W4L_F, deoxycytidylate deaminase [ <i>Homo sapiens</i> ] (99.93%/4.4*10 <sup>-24</sup> )            | hypothetical protein HOV36_gp41 [ <i>Salmonella</i> phage ZCSE2]                            | 91  | 6e-41  | 52.48 | YP_009821756.1 |
|      |        |       |      |     |     |                                                                                                      | deoxycytidylate deaminase [ <i>Salmonella</i> phage birk]                                   | 91  | 3e-40  | 49.29 | YP_009857696.1 |
| g66R | 444393 | 43866 | 528  | 175 | yes | No significant hits                                                                                  | hypothetical protein HWD20_gp35 [ <i>Salmonella</i> phage birk]                             | 100 | 2e-88  | 71.82 | YP_009857695.1 |
|      |        |       |      |     |     |                                                                                                      | hypothetical protein brorfstad_33 [ <i>Salmonella</i> phage brorfstad]                      | 100 | 2e-87  | 69.61 | QIN98324.1     |
| g67R | 45388  | 44495 | 894  | 297 | yes | 1C9K_C, Adenosyl-cobinamide kinase [ <i>Salmonella typhimurium</i> ] (99.33%/1.9*10 <sup>-11</sup> ) | putative P-loop containing nucleoside triphosphatehydrolase [ <i>Salmonella</i> virus S144] | 93  | 8e-162 | 76.70 | QMV47880.1     |
|      |        |       |      |     |     |                                                                                                      | hypothetical protein HWC20_gp16 [ <i>Salmonella</i> phage SE4]                              | 93  | 1e-161 | 77.14 | YP_009845596.1 |
| g68R | 45619  | 45389 | 231  | 76  | no  | No significant hits                                                                                  | hypothetical protein HWC20_gp15 [ <i>Salmonella</i> phage SE4]                              | 100 | 8e-23  | 57.89 | YP_009845595.1 |
|      |        |       |      |     |     |                                                                                                      | hypothetical protein [ <i>Salmonella</i> virus S144]                                        | 100 | 1e-22  | 59.21 | QMV47881.1     |
| g69R | 46099  | 45677 | 423  | 140 | no  | No significant hits                                                                                  | hypothetical protein HWC20_gp14 [ <i>Salmonella</i> phage SE4]                              | 95  | 2e-19  | 36.17 | YP_009845594.1 |

|      |       |       |      |     |     |                                                                                     |                                                                      |     |       |       |                |
|------|-------|-------|------|-----|-----|-------------------------------------------------------------------------------------|----------------------------------------------------------------------|-----|-------|-------|----------------|
|      |       |       |      |     |     |                                                                                     | hypothetical protein HOV36_gp45 [ <i>Salmonella</i> phage ZCSE2]     | 94  | 4e-19 | 36.69 | YP_009821760.1 |
| g70R | 47200 | 46148 | 1053 | 350 | yes | No significant hits                                                                 | hypothetical protein HOV36_gp46 [ <i>Salmonella</i> phage ZCSE2]     | 100 | 5e-97 | 47.21 | YP_009821761.1 |
|      |       |       |      |     |     |                                                                                     | hypothetical protein [ <i>Salmonella</i> virus S144]                 | 100 | 4e-96 | 46.93 | QMV47883.1     |
| g71R | 47572 | 47273 | 300  | 99  | no  | No significant hits                                                                 | hypothetical protein HWC20_gp12 [ <i>Salmonella</i> phage SE4]       | 95  | 1e-35 | 61.05 | YP_009845592.1 |
|      |       |       |      |     |     |                                                                                     | hypothetical protein HOV36_gp47 [ <i>Salmonella</i> phage ZCSE2]     | 96  | 1e-35 | 60.42 | YP_009821762.1 |
| g72R | 47835 | 47569 | 267  | 88  | no  | 6QX5_G, Portal protein { <i>Escherichia</i> phage T7} (91.71%/0.31)                 | hypothetical protein HWD19_gp25 [ <i>Salmonella</i> phage yarpen]    | 97  | 3e-11 | 40.22 | YP_009857616.1 |
|      |       |       |      |     |     |                                                                                     | hypothetical protein triss_27 [ <i>Salmonella</i> phage triss]       | 97  | 2e-10 | 40.22 | QIN99047.1     |
| g73R | 48157 | 47798 | 360  | 119 | no  | No significant hits                                                                 | No significant similarity found                                      |     |       |       |                |
| g74R | 48593 | 48144 | 450  | 149 | yes | No significant hits                                                                 | hypothetical protein BJD50_gp72 [ <i>Salmonella</i> phage BP63]      | 95  | 9e-69 | 71.83 | YP_009302991.1 |
|      |       |       |      |     |     |                                                                                     | hypothetical protein vBSenM1_22 [ <i>Salmonella</i> phage vB_SenM-1] | 95  | 9e-69 | 70.83 | QJQ40022.1     |
| g75R | 48843 | 48568 | 276  | 91  | yes | No significant hits                                                                 | No significant similarity found                                      |     |       |       |                |
| g76R | 49084 | 48845 | 240  | 79  | no  | No significant hits                                                                 | hypothetical protein HWC20_gp06 [ <i>Salmonella</i> phage SE4]       | 100 | 8e-39 | 77.22 | YP_009845586.1 |
|      |       |       |      |     |     |                                                                                     | hypothetical protein HOV36_gp52 [ <i>Salmonella</i> phage ZCSE2]     | 88  | 3e-32 | 71.43 | YP_009821767.1 |
| g77R | 49534 | 49175 | 360  | 119 | no  | No significant hits                                                                 | hypothetical protein HWC20_gp05 [ <i>Salmonella</i> phage SE4]       | 100 | 4e-65 | 80.67 | YP_009845585.1 |
|      |       |       |      |     |     |                                                                                     | hypothetical protein [ <i>Salmonella</i> virus S144]                 | 100 | 1e-31 | 53.60 | QMV47891.1     |
| g78R | 49956 | 49531 | 426  | 141 | yes | No significant hits                                                                 | hypothetical protein HWC20_gp04 [ <i>Salmonella</i> phage SE4]       | 100 | 9e-56 | 58.87 | YP_009845584.1 |
|      |       |       |      |     |     |                                                                                     | hypothetical protein HOV36_gp54 [ <i>Salmonella</i> phage ZCSE2]     | 100 | 2e-55 | 58.16 | YP_009821769.1 |
| g79  | 50114 | 50443 | 330  | 109 | yes | No significant hits                                                                 | hypothetical protein emhyr_24 [ <i>Salmonella</i> phage emhyr]       | 97  | 6e-49 | 72.64 | QIN98901.1     |
|      |       |       |      |     |     |                                                                                     | glutaredoxin [ <i>Salmonella</i> phage ZCSE2]                        | 97  | 9e-47 | 70.75 | YP_009821770.1 |
| g80  | 50421 | 52952 | 2532 | 843 | yes | 6A9W_A, Primase { <i>Nitratiruptor</i> phage NrS-1} (99.88%/8.9*10 <sup>-21</sup> ) | DNA primase/helicase [ <i>Salmonella</i> phage SE13]                 | 100 | 0.0   | 79.15 | YP_009845509.1 |
|      |       |       |      |     |     |                                                                                     | DNA primase/helicase [ <i>Salmonella</i> phage vB_SenM-1]            | 100 | 0.0   | 78.91 | QJQ40027.1     |

**Table S3.** Primers to amplify control genes encoding toxic and non-toxic gene products.

| Phage                          | Gene        | Primer  | Sequence (5' – 3')                           | Restriction site | Size |
|--------------------------------|-------------|---------|----------------------------------------------|------------------|------|
| <i>Toxic gene products</i>     |             |         |                                              |                  |      |
| fHy-Kpn01                      | <i>g10</i>  | Gp10FW  | GCAG <u>CGGCCG</u> CATGATTAAGTACGATGTATACAAG | <i>NotI</i>      | 210  |
|                                |             | Gp10RV  | GGT <u>CCATGG</u> CTACTGTGAGCATAGGCTG        | <i>NcoI</i>      |      |
|                                | <i>g22</i>  | Gp22FW  | GCAG <u>CGGCCG</u> CATGATTGACAGAGAAGAGATAC   | <i>NotI</i>      | 549  |
|                                |             | Gp22RV  | GGT <u>CCATGG</u> TTAATATGCATCACGCACC        | <i>NcoI</i>      |      |
|                                | <i>g38</i>  | Gp38FW  | GCAG <u>CGGCCG</u> CATGAAGTTAAACACACTAGTAA   | <i>NotI</i>      | 441  |
|                                |             | Gp38RV  | GGT <u>CCATGG</u> TCATTCTGACCTCACTAAATG      | <i>NcoI</i>      |      |
| φR1-RT                         | <i>g137</i> | Gp137FW | GCAG <u>CGGCCG</u> CATGAAAATTGCTGAACTAAT     | <i>NotI</i>      | 183  |
|                                |             | Gp137RV | GGT <u>CCATGG</u> CTATGAGGACTTAGAAATTGT      | <i>NcoI</i>      |      |
| T4                             | <i>regB</i> | RegBFW  | GATC <u>GCGGCCG</u> CCCATGACTATCAATACAGAAG   | <i>NotI</i>      | 491  |
|                                |             | RegBRV  | GGCC <u>GCTAGC</u> TTACCTCATTGAGTTTTAATTAC   | <i>NheI</i>      |      |
| <i>Non-toxic gene products</i> |             |         |                                              |                  |      |
| φR1-RT                         | <i>g119</i> | Gp119FW | GCAG <u>CGGCCG</u> CATGAAAACGTATAAAGAATTTTTG | <i>NotI</i>      | 591  |
|                                |             | Gp119RV | GGT <u>CCATGG</u> TTAACGAACGTTAGTGCCA        | <i>NcoI</i>      |      |
|                                | <i>g121</i> | Gp121FW | GCAG <u>CGGCCG</u> CATGAAAACCTATAATGAATTTATC | <i>NotI</i>      | 273  |
|                                |             | Gp121RV | GGT <u>CCATGG</u> TTAGGAAGCTTTTTTAAGC        | <i>NcoI</i>      |      |
|                                | <i>g150</i> | Gp150FW | GCAG <u>CGGCCG</u> CATGATTAAAGTTAATGAGC      | <i>NotI</i>      | 1728 |
|                                |             | Gp150RV | GGT <u>GCTAGC</u> TATCCAATATCAATTCGTGAA      | <i>NheI</i>      |      |
|                                | <i>g178</i> | Gp178FW | GCAG <u>CGGCCG</u> CATGAGCAATATTAACCAGC      | <i>NotI</i>      | 1275 |
|                                |             | Gp178RV | GGT <u>CCATGG</u> TATCCTGCTATTAGTTTAGG       | <i>NcoI</i>      |      |
|                                | <i>g246</i> | Gp246FW | GCAG <u>CGGCCG</u> CATGTCTTTAAATGAAATG       | <i>NotI</i>      | 939  |
|                                |             | Gp246RV | GGT <u>CCATGG</u> TAAAAATCATTTGCATG          | <i>NcoI</i>      |      |

**Table S4.** Primers used to amplify the HPUF genes of fHy-Eco03. Sequences are presented in 5' to 3' direction and restriction sites (*NcoI*, *NheI*) are underlined. Sizes of the genes in basepairs (bp) are given including the start and the stop codons.

| Gene       | Forward primer                       | Reverse primer                     | Size (bp) |
|------------|--------------------------------------|------------------------------------|-----------|
| <i>g01</i> | GCAGCGGCCGCATGAGCTATACTGACCAACA      | GGTCCATGGTTACAGTTGACCTCTCAGG       | 198       |
| <i>g03</i> | GCAGCGGCCCGTGTATTGGCTTAATCCTGG       | GGTCCATGGTTAGTCTTGTTTCAACTCATCG    | 186       |
| <i>g04</i> | GCAGCGGCCGCATGTTTAAATTCTTACAACGTAACC | GGTCCATGGTCACAAGTAATCTCCTTCAAC     | 180       |
| <i>g05</i> | GCAGCGGCCGCATGTTTTCTGAGGAGCAACT      | GGTCCATGGTTATTTGCTCCTTACTCCAAGT    | 246       |
| <i>g06</i> | GCAGCGGCCGCATGAAAAAGCATGTTGTTGAG     | GGTCCATGGTCAGAAAACATAAGACAACACC    | 120       |
| <i>g08</i> | GCAGCGGCCGCATGCCATTAATCAAAGTTACAG    | GGTCCATGGTCAAGAAATAATTACCTCAGTAAC  | 201       |
| <i>g09</i> | GCAGCGGCCGCATGGTAACATTCACAACATATCC   | GGTCCATGGTTAAACCTCAAATTTTGATTCGTC  | 228       |
| <i>g10</i> | GCAGCGGCCGCATGATGAAAGAATTGACATTGAC   | GGTCCATGGCTATTGTAACCTTGTACTAATTGA  | 177       |
| <i>g11</i> | GCAGCGGCCGCATGCATACTCAATTAATCATCTGG  | GGTCCATGGTCATTCTCCTGAGTTAAATTGTG   | 171       |
| <i>g13</i> | GCAGCGGCCGCATGACTGTAGTTGCACCT        | GGTCCATGGTCATTTTACCTTAAATTTAAGCCA  | 237       |
| <i>g15</i> | GCAGCGGCCGCATGAACATCATAGTTGAGGGA     | GGTCCATGGTCATTTAGTCCACTCCTTATCG    | 507       |
| <i>g17</i> | GCAGCGGCCGCATGGACTTATTCGACTTAGTTGA   | GGTCCATGGTTATGCCATTTCTACCAGCA      | 291       |
| <i>g18</i> | GCAGCGGCCGCATGGCACGAAAACCACAA        | GGTCCATGGTCAAGATTCATTATTATCCTCGTCC | 324       |
| <i>g23</i> | GCAGCGGCCGCATGGGTGGCGCAAGAATC        | GGTCCATGGCTAATTTTGTACAAGTAAACCAGAG | 369       |
| <i>g26</i> | GCAGCGGCCGCATGGGCCTGTTGAAGATTAC      | GGTCCATGGTCAGGTAATTGTAAAAGCCGG     | 402       |

|            |                                      |                                     |     |
|------------|--------------------------------------|-------------------------------------|-----|
| <i>g40</i> | GCAGCGGCCGCATGAGAACCAGACGACTTGA      | GGTCCATGGCTACCCGCAACAGTGTC          | 360 |
| <i>g48</i> | GCAGCGGCCGCTTGACCTCATGCAGTAAAAAG     | GGTCCATGGTTAATTGGCCCCTTCACT         | 216 |
| <i>g50</i> | GCAGCGGCCGCATGATTGAATCTACACGCAC      | GGTCCATGGTTAGCGCTTTCCTTTCTTTT       | 225 |
| <i>g51</i> | GCAGCGGCCGCATGAGAAAGTTTACCCTGGA      | GGTCCATGGTCAATCATATTTCTTAGCCAAGT    | 156 |
| <i>g52</i> | GCAGCGGCCGCGTGTCTAATATAGGTTTAGAGTACC | GGTCCATGGTCATTTGCATTCTTCCTCG        | 276 |
| <i>g58</i> | GCAGCGGCCGCTTGATATTCATGCTTCGCTC      | GGTCCATGGTCATGCAACACCATCCTTGTT      | 147 |
| <i>g59</i> | GCAGCGGCCGCTTGAATGTAGCATTAAGTGTGGC   | GGTCCATGGTCAGCGAGCAGACTCGAAC        | 126 |
| <i>g61</i> | GCAGCGGCCGCTTGGGCAACCGAGAACAG        | GGTCCATGGCTAAAAAGGCACTTTATAGTCAAAAG | 216 |
| <i>g64</i> | GCAGCGGCCGCATGTTTGTGCCGATTCCG        | GGTCCATGGTCAATTTCGCTTCTTCAGCG       | 549 |
| <i>g65</i> | GCAGCGGCCGCATGCAGAACCTTTGGGATA       | GGTCCATGGTCAGCTTGTGTAGCCGG          | 450 |
| <i>g68</i> | GCAGCGGCCGCATGTATACGTTCAATCAATTCAAA  | GGTCCATGGTTAATACCCCTCTGTTAACATC     | 231 |
| <i>g69</i> | GCAGCGGCCGCATGGAAGCCACCAAGTCT        | GGTCCATGGTTATTTATACACTTCAATGGTACAC  | 423 |
| <i>g71</i> | GCAGCGGCCGCATGAGTGAGAACTTCGAGAAG     | GGTCCATGGTTATTTTAGTGCCCCTTCGCA      | 300 |
| <i>g72</i> | GCAGCGGCCGCATGAAAGCGGTCAACAAGAA      | GGTCCATGGTCATGGCAGTTCTACCTGTAC      | 267 |
| <i>g73</i> | GCAGCGGCCGCATGGCGACGAGTAAAAACG       | GGTCCATGGTTATCTTCCTGACTGTACTTCTTG   | 360 |
| <i>g76</i> | GCAGCGGCCGCATGAAACATCAGGGCACA        | GGTCCATGGTTATCTCCAGCGTGCATG         | 240 |
| <i>g77</i> | GCAGCGGCCGCATGAAAACAATGTTTGTATACAAG  | GGTCCATGGTCACAGGCCTAACACCTC         | 360 |

**Table S5.** Workflow for the NGS assay bioinformatics. The raw NGS read data was analyzed using the Puhti computer environment at CSC (the Finnish Centre for Scientific Computing) following the protocol outlined below.

| Step | Description                                                                                                                                                                                                                                                                                                                                                                                                   | Command or script                                                                                                                                                                                                    |
|------|---------------------------------------------------------------------------------------------------------------------------------------------------------------------------------------------------------------------------------------------------------------------------------------------------------------------------------------------------------------------------------------------------------------|----------------------------------------------------------------------------------------------------------------------------------------------------------------------------------------------------------------------|
| 1    | The sequences over the ligation joints in the predicted plasmids on both sides of the HPUF gene fragment were determined <i>in silico</i> as described for table S8 and illustrated in figure 1b. A text document containing each sequence on its own line was prepared and saved under the name <b>list.txt</b> . This file was uploaded by WinSCP to the Puhti directory containing the NGS raw data files. |                                                                                                                                                                                                                      |
| 2    | Bio tools were activated using the commands                                                                                                                                                                                                                                                                                                                                                                   | <pre>\$ module load biokit and \$ module load velvet</pre>                                                                                                                                                           |
| 3    | The compressed fastq.gz NGS sequence read files were uncompressed with the gunzip command                                                                                                                                                                                                                                                                                                                     | <pre>\$ gunzip file_name.gz</pre>                                                                                                                                                                                    |
| 4    | The paired end fastq-files were interleaved to a single file using the shufflesequences command.                                                                                                                                                                                                                                                                                                              | <pre>\$ shuffleSequences_fastq.pl read_file_1.fq read_file_2.fq file_name.fastq</pre>                                                                                                                                |
| 5    | Alignments were run as a batch job by first editing the bash script text file template (file_name.sh) to include the required file names and paths                                                                                                                                                                                                                                                            | <pre>#!/bin/bash -l #SBATCH -o std1.out #SBATCH -e std1.err #SBATCH -p small #SBATCH --account=skurnik #SBATCH --ntasks=1 #SBATCH --cpus-per-task=1 #SBATCH --nodes=1 #SBATCH -t 48:00:00 #SBATCH --mem=128000</pre> |



```

module load biokit
#change directory to the one where you
have the data
cd /file_path

# insert the file name for your sequence
segment text file
a=1
for pat in $(cat
sequencelist_file_name.txt)
do
#insert the fastq filename of your
interleaved paired end reads
fuzznuc -pattern "$pat"
file_name.fastq -rformat excel -filter |
awk '{ if ( $1 != "SeqName") print $1 }' |
sort | uniq > name_${a}
(( a = a + 1 ))
done

```

|   |                                                                                                                                                                                                                                                                                  |                               |
|---|----------------------------------------------------------------------------------------------------------------------------------------------------------------------------------------------------------------------------------------------------------------------------------|-------------------------------|
| 6 | The bash file can be edited using Nano (version 2.3.1) with the nano command                                                                                                                                                                                                     | \$ nano <b>file_name.sh</b>   |
| 7 | To save the changes and to exit Nano the CTRL+O and CTRL+X commands were used                                                                                                                                                                                                    |                               |
| 8 | The batch job was submitted by using the sbatch command                                                                                                                                                                                                                          | \$ sbatch <b>file_name.sh</b> |
| 9 | The batch job results in a number of files with a name containing a running number corresponding to each sequence line in the <b>list.txt</b> file created in point 1. Each name_N file created contains the information of the number of reads containing the searched sequence |                               |

**Table S6.** LC-MS/MS analysis of the proteome of the fHy-Eco03 virion particles with the hits sorted by their decreasing score values. Note that the values in last three columns represent the encoded amino acids within the full open reading frame inside which the predicted gene resides.

| Gene    | Predicted function of the gene product | Gene location   | Score  | Coverage | # Peptides | # PSMs | # AAs | MW [kDa] | calc. pI |
|---------|----------------------------------------|-----------------|--------|----------|------------|--------|-------|----------|----------|
| product |                                        |                 |        |          |            |        |       |          |          |
| Gp35    | Tape measure protein                   | 23078..24769    | 289,05 | 60,35    | 29         | 79     | 565   | 61,2     | 9,06     |
| Gp29    | No significant hits                    | 15169..18132    | 228,44 | 52,48    | 40         | 66     | 987   | 111,5    | 5,33     |
| Gp22    | Major capsid protein                   | 11285..12253    | 206,47 | 70,06    | 18         | 53     | 324   | 34,6     | 5,07     |
| Gp30    | Tail tube protein                      | 18199..18630    | 144,07 | 85,71    | 14         | 47     | 154   | 16,4     | 5,02     |
| Gp41    | Baseplate wedge protein                | 27957..29114    | 168,29 | 59,08    | 19         | 46     | 391   | 42,6     | 4,77     |
| Gp36    | No significant hits                    | 24766..25665    | 112,65 | 22,67    | 6          | 37     | 300   | 32,5     | 5,07     |
| Gp70    | No significant hits                    | (46148..47200)c | 112,32 | 53,52    | 17         | 35     | 355   | 40,1     | 8,65     |
| Gp80    | DNA primase / helicase                 | 50421..52952    | 90,97  | 36,57    | 23         | 30     | 845   | 96,4     | 6,61     |
| Gp67    | Putative NTP hydrolase                 | (44495..45388)c | 76,39  | 41,75    | 12         | 23     | 297   | 33,6     | 5,88     |
| Gp28    | No significant hits                    | 14556..15176    | 79,88  | 68,57    | 8          | 20     | 210   | 21,8     | 5,15     |
| Gp27    | Tail-to-head joining protein           | 14020..14553    | 56,33  | 42,50    | 10         | 19     | 200   | 22,5     | 6,54     |
| Gp55    | Thymidylate synthase                   | (36983..37912)c | 67,18  | 58,59    | 11         | 18     | 326   | 36,9     | 5,82     |
| Gp31    | Outer capsid protein                   | 18670..20787    | 42,43  | 14,41    | 11         | 17     | 708   | 73,8     | 4,40     |
| Gp43    | Tail fiber protein                     | 29750..31099    | 56,48  | 50,78    | 12         | 17     | 451   | 48,6     | 6,89     |
| Gp20    | Portal protein                         | 8842..10389     | 58,74  | 40,61    | 10         | 16     | 522   | 58,6     | 5,03     |
| Gp32    | Tail sheath protein                    | 20874..22007    | 48,90  | 32,22    | 9          | 14     | 388   | 42,8     | 5,10     |
| Gp37    | No significant hits                    | 25662..26054    | 46,54  | 55,15    | 5          | 14     | 136   | 14,9     | 4,88     |
| Gp14    | Dihydrofolate reductase                | 4697..5368      | 37,98  | 47,79    | 7          | 12     | 226   | 25,4     | 6,40     |
| Gp39    | No significant hits                    | 26945..27586    | 47,75  | 44,44    | 5          | 12     | 216   | 23,1     | 4,84     |
| Gp62    | ATP dependent helicase                 | (40268..41941)c | 37,36  | 27,03    | 9          | 12     | 566   | 63,0     | 8,51     |
| Gp21    | Scaffold protein                       | 10566..11282    | 45,45  | 33,75    | 4          | 11     | 240   | 26,8     | 6,20     |
| Gp16    | No significant hits                    | 5868..6590      | 32,98  | 35,42    | 5          | 8      | 240   | 27,1     | 5,64     |
| Gp19    | Large terminase subunit                | 7389..8840      | 25,81  | 22,94    | 6          | 8      | 497   | 56,2     | 7,39     |

|        |                                   |                 |       |       |   |   |     |      |       |
|--------|-----------------------------------|-----------------|-------|-------|---|---|-----|------|-------|
| Gp25   | No significant hits               | 13226..13693    | 21,57 | 35,54 | 5 | 8 | 166 | 19,0 | 10,18 |
| Gp60   | No significant hits               | (40268..41941)c | 29,40 | 44,91 | 6 | 8 | 167 | 18,1 | 8,48  |
| Gp12   | No significant hits               | 3967..4461      | 23,45 | 46,95 | 3 | 7 | 164 | 19,1 | 5,07  |
| Gp33   | DUF3277 domain-containing protein | 22019..22450    | 18,90 | 43,75 | 6 | 7 | 144 | 15,8 | 5,22  |
| Gp38   | Baseplate protein                 | 25996..26943    | 24,50 | 24,07 | 5 | 7 | 324 | 35,7 | 8,19  |
| Gp53   | DNA polymerase                    | (33986..35953)c | 25,84 | 13,22 | 5 | 7 | 658 | 73,5 | 6,70  |
| Gp42   | No significant hits               | 29107..29757    | 22,45 | 33,49 | 5 | 6 | 218 | 24,5 | 6,18  |
| Gp66   | No significant hits               | (43866..44393)c | 15,56 | 46,93 | 3 | 6 | 179 | 19,0 | 5,05  |
| Gp34   | No significant hits               | 22469..22927    | 20,70 | 24,20 | 3 | 5 | 157 | 16,7 | 6,57  |
| Gp56   | NTP hydrolase                     | (38501..38899)c | 16,88 | 21,95 | 4 | 5 | 205 | 23,6 | 5,25  |
| Gp74   | No significant hits               | (48144..48593)c | 13,78 | 31,33 | 3 | 5 | 150 | 16,8 | 8,90  |
| Gp24   | Head-to-tail connector            | 12730..13224    | 12,48 | 26,49 | 3 | 4 | 185 | 20,8 | 5,74  |
| Gp45   | No significant hits               | 31727..31972    | 12,06 | 12,06 | 2 | 4 | 141 | 15,6 | 8,94  |
| Gp63   | Exonuclease                       | (42005..42877)c | 13,99 | 16,06 | 3 | 4 | 249 | 29,0 | 7,43  |
| Gp57   | No significant hits               | (38501..38899)c | 11,22 | 23,60 | 3 | 4 | 161 | 19,3 | 9,03  |
| Gp53.1 | No significant hits               | (35458..35916)c | 12,27 | 30,67 | 4 | 4 | 163 | 18,3 | 11,17 |
| Gp78   | No significant hits               | (49531..49956)c | 16,04 | 28,48 | 2 | 4 | 151 | 17,4 | 5,34  |
| Gp75   | No significant hits               | (48568..48843)c | 12,12 | 60,38 | 3 | 4 | 106 | 12,2 | 4,88  |
| Gp79   | No significant hits               | 50114..50443    | 6,22  | 28,80 | 3 | 3 | 125 | 14,3 | 9,26  |
| Gp02   | Holliday-junction resolvase       | 311..736        | 3,32  | 21,97 | 2 | 2 | 173 | 19,5 | 8,62  |
| Gp44   | Til fiber assembly protein        | 31096..31629    | 5,71  | 16,13 | 2 | 2 | 186 | 20,6 | 5,08  |
| Gp46   | Lysozyme                          | 31947..32510    | 3,83  | 16,75 | 2 | 2 | 191 | 21,2 | 9,00  |
| Gp47   | Spanin                            | 32480..32830    | 7,81  | 18,75 | 2 | 2 | 128 | 13,9 | 8,98  |
| Gp49   | No significant hits               | (33042..33320)c | 6,10  | 17,17 | 2 | 2 | 99  | 11,0 | 7,28  |
| Gp07   | No significant hits               | (1550..2122)c   | 4,31  | 12,32 | 2 | 2 | 203 | 22,5 | 5,27  |

**Table S7.** Results from plating assay of control genes.

| Type of gene | Gene        | Experiment 1 |      |      | Experiment 2 |      |      | Average | SD  |
|--------------|-------------|--------------|------|------|--------------|------|------|---------|-----|
|              |             | CFU1         | CFU2 | CFU3 | CFU1         | CFU2 | CFU3 |         |     |
| Toxic        | <i>g137</i> | 85           | 103  | 125  | 114          | 122  | 104  | 109     | 13  |
|              | <i>g38</i>  | 65           | 57   | 93   | 78           | 54   | 77   | 71      | 13  |
|              | <i>g22</i>  | 16           | 17   | 16   | 12           | 10   | 19   | 15      | 3   |
|              | <i>g10</i>  | 8            | 12   | 15   | 4            | 5    | 8    | 9       | 4   |
|              | <i>regB</i> | 4            | 5    | 5    | 8            | 7    | 12   | 7       | 3   |
| Non-toxic    | <i>g178</i> | 760          | 624  | 788  | 451          | 391  | 447  | 577     | 157 |
|              | <i>g119</i> | 350          | 401  | 352  | 742          | 797  | 794  | 573     | 206 |
|              | <i>g121</i> | 366          | 335  | 320  | 375          | 378  | 312  | 348     | 26  |
|              | <i>g246</i> | 247          | 278  | 246  | 350          | 376  | 332  | 305     | 51  |
|              | <i>g150</i> | 199          | 200  | 189  | 356          | 312  | 376  | 272     | 78  |

**Table S8.** Results of the NGS assay with control genes. For each gene, two pairs of complementary sequences over the ligation joints were determined *in silico* containing 15-25 nt of the gene and plasmid specific sequences (the latter underlined). The joints named as *gx\_atg* and *gx\_stop* are sequences specific for the forward strand containing the start or stop codons of the inserted genes, while sequences named *gx\_atgrev* and *gx\_stoprev* are the corresponding complementary sequences from the reverse strand. Elp1 and Elp2 stand for plasmid DNA isolated from replicate transformations. The reads containing these joint sequences were extracted from the NGS sequence read files as described in Table S6. The joint-read totals for each gene and their percentages of total joint-reads were calculated. These were then used to calculate the plasmid DNA ligation mixture abundance ratios.

| Gene        | Joint               | Joint sequence                                            | Pooled ligation mixture |            |        | Pooled plasmid DNA        |                           |            |        | Plasmid/ligation ratio |
|-------------|---------------------|-----------------------------------------------------------|-------------------------|------------|--------|---------------------------|---------------------------|------------|--------|------------------------|
|             |                     |                                                           | <i>N</i> joint-reads    | Gene total | Gene % | <i>N</i> joint-reads Elp1 | <i>N</i> joint-reads Elp2 | Gene total | Gene % |                        |
| <i>g10</i>  | <i>g10_atg</i>      | <u>CCAAGCTTGCATGCCTGCAGGCGGCCGCATGATTAAGTACGATGT</u>      | 36                      |            |        | 11                        | 29                        |            |        |                        |
|             | <i>g10_atgrev</i>   | TATACATCGTACTTAATCAT <u>GCGGCCGCCTGCAGGCATGCAAGCT</u>     | 3                       |            |        | 10                        | 13                        |            |        |                        |
|             | <i>g10_stop</i>     | CAGCCTATGCTCACAGTAG <u>CCATGGAGCTAGCTCTAGAGGATCCC</u>     | 16                      |            |        | 148                       | 124                       |            |        |                        |
|             | <i>g10_stoprev</i>  | <u>GGGATCCTCTAGAGCTAGCTCCATGGCTACTGTGAGCATAGGCTG</u>      | 53                      | 108        | 0,86   | 152                       | 143                       | 630        | 0,13   | 0,15                   |
| <i>g22</i>  | <i>g22_atg</i>      | <u>CCAAGCTTGCATGCCTGCAGGCGGCCGCATGATTGACAGAGAAGA</u>      | 193                     |            |        | 22                        | 13                        |            |        |                        |
|             | <i>g22_atgrev</i>   | TCTCTTCTGTGTCAATCAT <u>GCGGCCGCCTGCAGGCATGCAAGCTT</u>     | 0                       |            |        | 32                        | 7                         |            |        |                        |
|             | <i>g22_stop</i>     | GGTGCCTGATGCATATTAAC <u>CATGGAGCTAGCTCTAGAGGATCCC</u>     | 5                       |            |        | 40                        | 94                        |            |        |                        |
|             | <i>g22_stoprev</i>  | <u>GGGATCCTCTAGAGCTAGCTCCATGGTTAATATGCATCACGCACC</u>      | 193                     | 391        | 3,10   | 21                        | 94                        | 323        | 0,07   | 0,02                   |
| <i>g38</i>  | <i>g38_atg</i>      | <u>CCAAGCTTGCATGCCTGCAGGCGGCCGCATGAAGTTAAACACACTAG</u>    | 1229                    |            |        | 17191                     | 16249                     |            |        |                        |
|             | <i>g38_atgrev</i>   | TTACTAGTGTGTTTTAACTTCAT <u>GCGGCCGCCTGCAGGCATGCAAGCT</u>  | 3                       |            |        | 14108                     | 13946                     |            |        |                        |
|             | <i>g38_stop</i>     | GGGATCCTCTAGAGCTAGCTCCATGGTCACTTCTGACCTCACTAAATG          | 614                     |            |        | 17730                     | 16471                     |            |        |                        |
|             | <i>g38_stoprev</i>  | CATTTAGTGAGGTCAGAATGA <u>CCATGGAGCTAGCTCTAGAGGATCCC</u>   | 23                      | 1869       | 14,84  | 17760                     | 16749                     | 130204     | 26,83  | 1,81                   |
| <i>g119</i> | <i>g119_atg</i>     | <u>CCAAGCTTGCATGCCTGCAGGCGGCCGCATGAAAACGTATAAAGAATT</u>   | 877                     |            |        | 11986                     | 11896                     |            |        |                        |
|             | <i>g119_atgrev</i>  | AATTCTTTATACGTTTTTCAT <u>GCGGCCGCCTGCAGGCATGCAAGCTTGG</u> | 4                       |            |        | 11539                     | 11460                     |            |        |                        |
|             | <i>g119_stop</i>    | TGGCACTAACGTTTCGTTAA <u>CCATGGAGCTAGCTCTAGAGGATCCC</u>    | 26                      |            |        | 12216                     | 12346                     |            |        |                        |
|             | <i>g119_stoprev</i> | <u>GGGATCCTCTAGAGCTAGCTCCATGGTTAACGAACGTTAGTGCCA</u>      | 567                     | 1474       | 11,70  | 11503                     | 11787                     | 94733      | 19,52  | 1,67                   |
| <i>g121</i> | <i>g121_atg</i>     | <u>CCAAGCTTGCATGCCTGCAGGCGGCCGCATGAAAACCTATAATGAATT</u>   | 156                     |            |        | 9467                      | 9211                      |            |        |                        |
|             | <i>g121_atgrev</i>  | AATTCATTATAGGTTTTTCAT <u>GCGGCCGCCTGCAGGCATGCAAGCTTGG</u> | 2                       |            |        | 10055                     | 10311                     |            |        |                        |
|             | <i>g121_stop</i>    | GCTTAAAAAAGCTTCCTAA <u>CCATGGAGCTAGCTCTAGAGGATCCC</u>     | 24                      |            |        | 9823                      | 9688                      |            |        |                        |
|             | <i>g121_stoprev</i> | <u>GGGATCCTCTAGAGCTAGCTCCATGGTTAGGAAGCTTTTTTAAGC</u>      | 170                     | 352        | 2,79   | 9087                      | 8714                      | 76356      | 15,74  | 5,63                   |
| <i>g137</i> | <i>g137_atg</i>     | <u>CCAAGCTTGCATGCCTGCAGGCGGCCGCATGAAAATGCTGAACATAAT</u>   | 16                      |            |        | 7000                      | 7362                      |            |        |                        |
|             | <i>g137_atgrev</i>  | ATTAGTTCAGCAATTTTCAT <u>GCGGCCGCCTGCAGGCATGCAAGCTTGG</u>  | 0                       |            |        | 8356                      | 8866                      |            |        |                        |

|                    |                     |                                                        |      |              |             |               |      |       |       |
|--------------------|---------------------|--------------------------------------------------------|------|--------------|-------------|---------------|------|-------|-------|
|                    | <i>g137_stop</i>    | <u>ACAATTTCTAAGTCCTCATAGCCATGGAGCTAGCTCTAGAGGATCCC</u> | 15   |              |             | 9320          | 9287 |       |       |
|                    | <i>g137_stoprev</i> | <u>GGGATCCTCTAGAGCTAGCTCCATGGCTATGAGGACTTAGAAATTGT</u> | 30   | 61           | 0,48        | 6716          | 6924 | 63831 | 13,15 |
| <i>g150</i>        | <i>g150_atg</i>     | <u>CCAAGCTTGCATGCCTGCAGGCGGCCGCATGATTAAAGTTAATGAGC</u> | 1641 |              |             | 2398          | 2625 |       |       |
|                    | <i>g150_atgrev</i>  | <u>GCTCATTAACTTTAATCATGCGGCCGCCTGCAGGCATGCAAGCTTGG</u> | 3    |              |             | 2320          | 2489 |       |       |
|                    | <i>g150_stop</i>    | <u>CACGAATTGATATTGGATAGGCTAGCTCTAGAGGATCCCCGGGTAC</u>  | 17   |              |             | 2162          | 2245 |       |       |
|                    | <i>g150_stoprev</i> | <u>GTACCGGGGATCCTCTAGAGCTAGCCTATCCAATATCAATTTCGTG</u>  | 1032 | 2693         | 21,38       | 1950          | 2288 | 18477 | 3,81  |
| <i>g178</i>        | <i>g178_atg</i>     | <u>CCAAGCTTGCATGCCTGCAGGCGGCCGCATGAGCAATATTAACCAGC</u> | 1387 |              |             | 7335          | 6952 |       |       |
|                    | <i>g178_atgrev</i>  | <u>GCTGGTTAATATTGCTCATGCGGCCGCCTGCAGGCATGCAAGCTTGG</u> | 0    |              |             | 6305          | 6202 |       |       |
|                    | <i>g178_stop</i>    | <u>AAACTAATAGCAGGATAACCATGGAGCTAGCTCTAGAGGATCCC</u>    | 9    |              |             | 6111          | 5619 |       |       |
|                    | <i>g178_stoprev</i> | <u>GGGATCCTCTAGAGCTAGCTCCATGGTTATCCTGCTATTAGTTT</u>    | 1342 | 2738         | 21,74       | 6462          | 6341 | 51327 | 10,58 |
| <i>g246</i>        | <i>g246_atg</i>     | <u>CCAAGCTTGCATGCCTGCAGGCGGCCGCATGTCTTTAAATGAAATG</u>  | 1487 |              |             | 6475          | 6464 |       |       |
|                    | <i>g246_atgrev</i>  | <u>CATTTTCATTTAAAGACATGCGGCCGCCTGCAGGCATGCAAGCTTGG</u> | 9    |              |             | 6219          | 6227 |       |       |
|                    | <i>g246_stop</i>    | <u>CATGCAAAATGATTTTAAACCATGGAGCTAGCTCTAGAGGATCCC</u>   | 19   |              |             | 6789          | 6478 |       |       |
|                    | <i>g246_stoprev</i> | <u>GGGATCCTCTAGAGCTAGCTCCATGGTTAAAAATCATTTCATG</u>     | 1396 | 2911         | 23,11       | 5442          | 5254 | 49348 | 10,17 |
| <i>regB</i>        | <i>regB_atg</i>     | <u>CCAAGCTTGCATGCCTGCAGGCGGCCGCATGACTATCAATACAG</u>    | 0    |              |             | 0             | 0    |       |       |
|                    | <i>regB_atgrev</i>  | <u>CTGTATTGATAGTCATGCGGCCGCCTGCAGGCATGCAAGCTTGG</u>    | 0    |              |             | 0             | 0    |       |       |
|                    | <i>regB_stop</i>    | <u>ATTAAAACTCAATGAGGTAAGGCTAGCTCTAGAGGATCCCC</u>       | 0    |              |             | 0             | 0    |       |       |
|                    | <i>regB_stoprev</i> | <u>GGGGATCCTCTAGAGCTAGCCTTACCTCATTGAGTTTAAAT</u>       | 0    | 0            | 0,00        | 0             | 0    | 0     | 0,00  |
| <b>Total reads</b> |                     |                                                        |      | <b>12597</b> | <b>100%</b> | <b>485229</b> |      |       |       |
|                    |                     |                                                        |      |              |             | <b>100%</b>   |      |       |       |

**Table S9.** Plating assay results of 23 HPUF-encoding genes of fHy-Eco03.

|             | Control genes |      |      |         |    | Ligation 1 |      |      |         |    | Ligation 2 |      |      |         |    | Fraction of <i>g178</i> |       |         |       |
|-------------|---------------|------|------|---------|----|------------|------|------|---------|----|------------|------|------|---------|----|-------------------------|-------|---------|-------|
|             | CFU1          | CFU2 | CFU3 | Average | SD | CFU1       | CFU2 | CFU3 | Average | SD | CFU1       | CFU2 | CFU3 | Average | SD | Lig 1                   | Lig 2 | Average | SD    |
| <i>regB</i> | 11            | 9    | 17   | 12      | 3  |            |      |      |         |    |            |      |      |         |    |                         |       |         |       |
| <i>g178</i> | 391           | 451  | 447  | 430     | 27 |            |      |      |         |    |            |      |      |         |    |                         |       |         |       |
| <i>g01</i>  |               |      |      |         |    | 353        | 321  | 419  | 364     | 41 | 186        | 303  | 175  | 221     | 58 | 0.847                   | 0.515 | 0.681   | 0.166 |
| <i>g03</i>  |               |      |      |         |    | 448        | 446  | 419  | 438     | 13 | 565        | 362  | 349  | 425     | 99 | 1.018                   | 0.989 | 1.003   | 0.014 |
| <i>g04</i>  |               |      |      |         |    | 263        | 312  | 247  | 274     | 28 | 278        | 324  | 311  | 304     | 19 | 0.637                   | 0.708 | 0.672   | 0.035 |
| <i>g05</i>  |               |      |      |         |    | 47         | 80   | 81   | 69      | 16 | 81         | 83   | 52   | 72      | 14 | 0.161                   | 0.167 | 0.164   | 0.003 |
| <i>g06</i>  |               |      |      |         |    | 400        | 389  | 343  | 377     | 25 | 225        | 222  | 185  | 211     | 18 | 0.878                   | 0.49  | 0.684   | 0.194 |
| <i>g08</i>  |               |      |      |         |    | 309        | 364  | 344  | 339     | 23 | 243        | 181  | 258  | 227     | 33 | 0.788                   | 0.529 | 0.659   | 0.130 |
| <i>g09</i>  |               |      |      |         |    | 432        | 400  | 423  | 418     | 13 | 312        | 290  | 277  | 293     | 14 | 0.973                   | 0.681 | 0.827   | 0.146 |
| <i>g10</i>  |               |      |      |         |    | 314        | 308  | 214  | 279     | 46 | 97         | 128  | 133  | 119     | 16 | 0.648                   | 0.278 | 0.463   | 0.185 |
| <i>regB</i> | 9             | 12   | 9    | 10      | 1  |            |      |      |         |    |            |      |      |         |    |                         |       |         |       |
| <i>g178</i> | 417           | 282  | 314  | 338     | 58 |            |      |      |         |    |            |      |      |         |    |                         |       |         |       |
| <i>g11</i>  |               |      |      |         |    | 399        | 380  | 388  | 389     | 8  | 173        | 149  | 337  | 220     | 84 | 1.151                   | 0.65  | 0.900   | 0.250 |
| <i>g13</i>  |               |      |      |         |    | 504        | 625  | 501  | 543     | 58 | 205        | 314  | 242  | 254     | 45 | 1.607                   | 0.75  | 1.179   | 0.429 |
| <i>g15</i>  |               |      |      |         |    | 482        | 479  | 513  | 491     | 15 | 244        | 282  | 239  | 255     | 19 | 1.454                   | 0.754 | 1.104   | 0.350 |
| <i>g17</i>  |               |      |      |         |    | 382        | 328  | 396  | 369     | 29 |            |      |      |         |    | 1.091                   |       | 0.645   | 0.223 |
| <i>regB</i> | 7             | 8    | 12   | 9       | 2  |            |      |      |         |    |            |      |      |         |    |                         |       |         |       |
| <i>g178</i> | 397           | 415  | 413  | 408     | 8  |            |      |      |         |    |            |      |      |         |    |                         |       |         |       |
| <i>g23</i>  |               |      |      |         |    | 196        | 191  | 205  | 197     | 6  |            |      |      |         |    | 0.484                   |       | 0.682   | 0.199 |
| <i>g48</i>  |               |      |      |         |    | 620        | 680  | 666  | 655     | 26 |            |      |      |         |    | 1.606                   |       | 1.711   | 0.105 |
| <i>g50</i>  |               |      |      |         |    | 449        | 370  | 382  | 400     | 35 |            |      |      |         |    | 0.981                   |       | 0.747   | 0.234 |
| <i>g51</i>  |               |      |      |         |    | 242        | 279  | 239  | 253     | 18 | 100        | 125  | 94   | 106     | 13 | 0.621                   | 0.261 | 0.441   | 0.180 |
| <i>regB</i> | 11            | 10   | 10   | 10      | 0  |            |      |      |         |    |            |      |      |         |    |                         |       |         |       |
| <i>g178</i> | 742           | 597  | 794  | 711     | 83 |            |      |      |         |    |            |      |      |         |    |                         |       |         |       |
| <i>g52</i>  |               |      |      |         |    | 486        | 348  | 331  | 388     | 69 | 335        | 319  | 252  | 302     | 36 | 0.546                   | 0.425 | 0.485   | 0.061 |

[illegible]



**Table S10.** NGS screening of phage fHy-Eco03 HPUF encoding genes. For each gene, two pairs of complementary sequences over the ligation joints were determined *in silico* containing 15-25 nt of the gene and plasmid specific sequences (the latter underlined). The joints named as *gx\_atg* and *gx\_stop* are sequences specific for the forward strand containing the start or stop codons of the inserted genes, while sequences named *gx\_atgrev* and *gx\_stoprev* are the corresponding complementary sequences from the reverse strand. Ligation Mix 1 and Mix 2 represent replicate ligation mixtures and Mix(1/2). Elp(1/2) represent replicate electroporations of the ligation mixes. The reads containing these joint sequences were extracted from the NGS sequence read files as described in Table S6. The joint-read totals for each gene and their percentages of total joint-reads were calculated. These were then used to calculate the plasmid DNA ligation mixture abundance ratios.

| Gene             | Joint       | Joint sequence                                               | Pooled ligations |       |            |            | Plasmid DNA from pooled transformants |          |          |          |            |            | % ratios |
|------------------|-------------|--------------------------------------------------------------|------------------|-------|------------|------------|---------------------------------------|----------|----------|----------|------------|------------|----------|
|                  |             |                                                              | Mix 1            | Mix 2 | N per gene | % per gene | Mix1Elp1                              | Mix1Elp2 | Mix2Elp1 | Mix2Elp2 | N per gene | % per gene |          |
| NGS experiment 1 |             |                                                              |                  |       |            |            |                                       |          |          |          |            |            |          |
| g01              | g01_atg     | <u>CCAAGCTTGCATGCCTGCAGGCGGCCGCATGAGCTATACTGACCAACA</u>      | 95               | 55    |            |            | 3562                                  | 3244     | 3162     | 2449     |            |            |          |
|                  | g01_atgrev  | <u>TGTTGGTCAGTATAGCTCATGCGGCCGCCTGCAGGCATGCAAGCTTGG</u>      | 0                | 2     |            |            | 3930                                  | 3443     | 3243     | 2451     |            |            |          |
|                  | g01_stop    | <u>CCTGAGAGGTCAACTGTAACTAGGAGCTAGCTCTAGAGGATCCC</u>          | 24               | 27    |            |            | 3704                                  | 3186     | 3293     | 2471     |            |            |          |
|                  | g01_stoprev | <u>GGGATCCTCTAGAGCTAGTCCATGGTTACAGTTGACCTCTCAGG</u>          | 126              | 105   | 434        | 1,31       | 3665                                  | 3312     | 3257     | 2484     | 50856      | 3,52       | 2,69     |
| g03              | g03_atg     | <u>CCAAGCTTGCATGCCTGCAGGCGGCCGCTGATTGGCTTAATCCTTGG</u>       | 104              | 81    |            |            | 5920                                  | 5084     | 4659     | 3780     |            |            |          |
|                  | g03_atgrev  | <u>CCAGGATTAAGCCAATCACGCGGCCGCTGCAGGCATGCAAGCTTGG</u>        | 2                | 2     |            |            | 5973                                  | 4799     | 4627     | 3435     |            |            |          |
|                  | g03_stop    | <u>CGATGAGTTGAAACAAGACTAACCATGGAGCTAGCTCTAGAGGATCCC</u>      | 14               | 24    |            |            | 5938                                  | 5086     | 4863     | 3754     |            |            |          |
|                  | g03_stoprev | <u>GGGATCCTCTAGAGCTAGTCCATGGTTAGTCTTGTTCACCTCATCG</u>        | 103              | 88    | 418        | 1,26       | 5770                                  | 4927     | 4656     | 3613     | 76884      | 5,33       | 4,22     |
| g04              | g04_atg     | <u>CCAAGCTTGCATGCCTGCAGGCGGCCGCATGTTTAAATTCCTACAACGTAACC</u> | 58               | 53    |            |            | 3239                                  | 2652     | 2607     | 2197     |            |            |          |
|                  | g04_atgrev  | <u>GGTTACGTTGTAAGAATTTAAACATGCGGCCGCCTGCAGGCATGCAAGCTTGG</u> | 4                | 2     |            |            | 3014                                  | 2477     | 2352     | 1885     |            |            |          |
|                  | g04_stop    | <u>GTTGAAGGAGATTACTTGTGACCATGGAGCTAGCTCTAGAGGATCCC</u>       | 26               | 18    |            |            | 3240                                  | 2553     | 2760     | 2184     |            |            |          |
|                  | g04_stoprev | <u>GGGATCCTCTAGAGCTAGTCCATGGTCACAAGTAATCTCCTTCAAC</u>        | 77               | 56    | 294        | 0,89       | 3347                                  | 2763     | 2729     | 2243     | 42242      | 2,93       | 3,30     |
| g05              | g05_atg     | <u>CCAAGCTTGCATGCCTGCAGGCGGCCGCATGTTTCTGAGGAGCAACT</u>       | 283              | 178   |            |            | 0                                     | 3        | 4        | 0        |            |            |          |
|                  | g05_atgrev  | <u>AGTTGCTCCTCAGAAAACATGCGGCCGCCTGCAGGCATGCAAGCTTGG</u>      | 2                | 1     |            |            | 0                                     | 0        | 0        | 0        |            |            |          |
|                  | g05_stop    | <u>ACTTGAGTAAGGAGCAAATAACCATGGAGCTAGCTCTAGAGGATCCC</u>       | 42               | 25    |            |            | 21                                    | 10       | 12       | 8        |            |            |          |
|                  | g05_stoprev | <u>GGGATCCTCTAGAGCTAGTCCATGGTTATTTGCTCCTTACTCCAAGT</u>       | 335              | 248   | 1114       | 3,36       | 33                                    | 38       | 5        | 12       | 146        | 0,01       | 0,003    |
| g06              | g06_atg     | <u>CCAAGCTTGCATGCCTGCAGGCGGCCGCATGAAAAGCATGTTGTTGAG</u>      | 27               | 26    |            |            | 3666                                  | 3012     | 3342     | 2638     |            |            |          |
|                  | g06_atgrev  | <u>CTCAACAACATGCTTTTTCATGCGGCCGCCTGCAGGCATGCAAGCTTGG</u>     | 8                | 11    |            |            | 3637                                  | 3076     | 3264     | 2626     |            |            |          |
|                  | g06_stop    | <u>GGTGTGTCTTATGTTTCTGACCATGGAGCTAGCTCTAGAGGATCCC</u>        | 156              | 175   |            |            | 3611                                  | 3256     | 3578     | 2895     |            |            |          |
|                  | g06_stoprev | <u>GGGATCCTCTAGAGCTAGTCCATGGTCAGAAAACATAAGACAACACC</u>       | 46               | 36    | 485        | 1,46       | 3562                                  | 3072     | 3373     | 2691     | 51299      | 3,56       | 2,43     |
| g08              | g08_atg     | <u>CCAAGCTTGCATGCCTGCAGGCGGCCGCATGCCATTAATCAAAGTTACAG</u>    | 80               | 46    |            |            | 4148                                  | 3417     | 3805     | 3052     |            |            |          |
|                  | g08_atgrev  | <u>CTGTAACCTTGTATTAAATGGCATGCGGCCGCCTGCAGGCATGCAAGCTTGG</u>  | 3                | 1     |            |            | 3528                                  | 3075     | 3626     | 2631     |            |            |          |
|                  | g08_stop    | <u>GTTACTGAGGTAATTTCTTGAACCATGGAGCTAGCTCTAGAGGATCCC</u>      | 41               | 26    |            |            | 4010                                  | 3509     | 4102     | 3220     |            |            |          |
|                  | g08_stoprev | <u>GGGATCCTCTAGAGCTAGTCCATGGTCAAGAAATAATTACCTCAGTAAC</u>     | 121              | 106   | 424        | 1,28       | 3581                                  | 3219     | 3749     | 2867     | 55539      | 3,85       | 3,01     |
| g09              | g09_atg     | <u>CCAAGCTTGCATGCCTGCAGGCGGCCGCATGGTAACATTCAACAATATCC</u>    | 251              | 142   |            |            | 5079                                  | 4545     | 3602     | 3039     |            |            |          |
|                  | g09_atgrev  | <u>GGATAGTTGTGAATGTTTACCATGCGGCCGCCTGCAGGCATGCAAGCTTGG</u>   | 10               | 3     |            |            | 5054                                  | 4295     | 3427     | 2766     |            |            |          |
|                  | g09_stop    | <u>GACGAATCAAAATTTGAGGTTTAAACCATGGAGCTAGCTCTAGAGGATCCC</u>   | 35               | 29    |            |            | 4920                                  | 4132     | 3430     | 2741     |            |            |          |
|                  | g09_stoprev | <u>GGGATCCTCTAGAGCTAGTCCATGGTTAAACCTCAAATTTGATTGCTC</u>      | 281              | 178   | 929        | 2,80       | 4617                                  | 4191     | 3383     | 2828     | 62049      | 4,30       | 1,53     |
| g10              | g10_atg     | <u>CCAAGCTTGCATGCCTGCAGGCGGCCGCATGATGAAAGAATTGACATTGAC</u>   | 80               | 28    |            |            | 2089                                  | 1723     | 1148     | 916      |            |            |          |
|                  | g10_atgrev  | <u>GTCAATGTCAATTCTTTCATCATGCGGCCGCCTGCAGGCATGCAAGCTTGG</u>   | 5                | 60    |            |            | 2152                                  | 1714     | 1290     | 943      |            |            |          |
|                  | g10_stop    | <u>TCAAATTAGTACAAAGTTACAATAGCCATGGAGCTAGCTCTAGAGGATCCC</u>   | 23               | 11    |            |            | 2273                                  | 1595     | 1317     | 985      |            |            |          |
|                  | g10_stoprev | <u>GGGATCCTCTAGAGCTAGTCCATGGCTATTGTAACCTTTGTACTAATTTGA</u>   | 92               | 60    | 359        | 1,08       | 1807                                  | 1549     | 1120     | 846      | 23467      | 1,63       | 1,50     |
| g11              | g11_atg     | <u>CCAAGCTTGCATGCCTGCAGGCGGCCGCATGCATACTCAATTAATCATCTGG</u>  | 71               | 67    |            |            | 2949                                  | 2514     | 2725     | 2207     |            |            |          |

|            |                    |                                                             |      |      |      |       |       |       |       |       |        |       |      |
|------------|--------------------|-------------------------------------------------------------|------|------|------|-------|-------|-------|-------|-------|--------|-------|------|
|            | <i>g11_atgrev</i>  | <u>CCAGATGATTAATTAGTATGCATGCGGCCGCTGCAGGCATGCAAGCTTGG</u>   | 4    | 5    |      |       | 2945  | 2530  | 2821  | 2149  |        |       |      |
|            | <i>g11_stop</i>    | <u>CACAATTTAACTCAGGAGAATGACCATGGAGCTAGCTCTAGAGGATCCC</u>    | 29   | 20   |      |       | 3157  | 2815  | 3035  | 2447  |        |       |      |
|            | <i>g11_stoprev</i> | <u>GGGATCCTCTAGAGCTAGCTCCATGGTCATTCTCCTGAGTTAAATTGTG</u>    | 90   | 68   | 354  | 1,07  | 3006  | 2491  | 2800  | 2282  | 42873  | 2,97  | 2,78 |
| <i>g13</i> | <i>g13_atg</i>     | <u>CCAAGCTTGCATGCCTGCAGCGCGCCGCATGACTGTAGTTGCACCT</u>       | 183  | 250  |      |       | 6229  | 5350  | 7414  | 5717  |        |       |      |
|            | <i>g13_atgrev</i>  | <u>AGGTGCAACTACAGTCATGCGGCCGCTGCAGGCATGCAAGCTTGG</u>        | 2    | 7    |      |       | 4250  | 3905  | 5337  | 3939  |        |       |      |
|            | <i>g13_stop</i>    | <u>TGGCTTAAATTTAAGGTAAATGACCATGGAGCTAGCTCTAGAGGATCCC</u>    | 12   | 21   |      |       | 4731  | 4310  | 6048  | 4987  |        |       |      |
|            | <i>g13_stoprev</i> | <u>GGGATCCTCTAGAGCTAGCTCCATGGTCATTTTACCTTAAATTTAAGCCA</u>   | 224  | 251  | 950  | 2,87  | 4921  | 4266  | 6056  | 4915  | 82375  | 5,71  | 1,99 |
| <i>g15</i> | <i>g15_atg</i>     | <u>CCAAGCTTGCATGCCTGCAGCGCGCCGCATGAACATCATAGTTGAGGGA</u>    | 820  | 595  |      |       | 6502  | 5798  | 3773  | 3065  |        |       |      |
|            | <i>g15_atgrev</i>  | <u>TCCCTCAACTATGATGTTTCATGCGGCCGCTGCAGGCATGCAAGCTTGG</u>    | 3    | 5    |      |       | 6322  | 5494  | 3775  | 2777  |        |       |      |
|            | <i>g15_stop</i>    | <u>CGATAAGGAGTGGACTAAATGACCATGGAGCTAGCTCTAGAGGATCCC</u>     | 42   | 29   |      |       | 6070  | 5806  | 3783  | 3228  |        |       |      |
|            | <i>g15_stoprev</i> | <u>GGGATCCTCTAGAGCTAGCTCCATGGTCATTTAGTCCACTCCTTATCG</u>     | 881  | 488  | 2863 | 8,64  | 6101  | 5753  | 3711  | 3146  | 75104  | 5,21  | 0,60 |
| <i>g17</i> | <i>g17_atg</i>     | <u>CCAAGCTTGCATGCCTGCAGCGCGCCGCATGGACTTATTGCACTTAGTTGA</u>  | 639  | 455  |      |       | 6207  | 5269  | 4906  | 4122  |        |       |      |
|            | <i>g17_atgrev</i>  | <u>TCAACTAAGTCGAATAAGTCCATGCGGCCGCTGCAGGCATGCAAGCTTGG</u>   | 8    | 2    |      |       | 5034  | 4373  | 4366  | 3212  |        |       |      |
|            | <i>g17_stop</i>    | <u>TGCTGGTAGAAATGGCATAACCATGGAGCTAGCTCTAGAGGATCCC</u>       | 65   | 46   |      |       | 6295  | 5211  | 5472  | 4377  |        |       |      |
|            | <i>g17_stoprev</i> | <u>GGGATCCTCTAGAGCTAGCTCCATGGTTATGCCATTTCTACCAGCA</u>       | 809  | 555  | 2579 | 7,79  | 5995  | 5116  | 5124  | 4126  | 79205  | 5,49  | 0,71 |
| <i>g23</i> | <i>g23_atg</i>     | <u>CCAAGCTTGCATGCCTGCAGCGCGCCGCATGGTGGCGCAAGAATC</u>        | 689  | 461  |      |       | 3220  | 2952  | 2936  | 2134  |        |       |      |
|            | <i>g23_atgrev</i>  | <u>GATTCTTGGGCCACCCATGCGGCCGCTGCAGGCATGCAAGCTTGG</u>        | 4    | 4    |      |       | 3019  | 2658  | 2716  | 2228  |        |       |      |
|            | <i>g23_stop</i>    | <u>TTTACTTGTACAAAATTAGCCATGGAGCTAGCTCTAGAG</u>              | 68   | 44   |      |       | 3380  | 3204  | 3293  | 2587  |        |       |      |
|            | <i>g23_stoprev</i> | <u>CTCTAGAGCTAGCTCCATGGCTAATTTTGTACAAGTAA</u>               | 1522 | 1213 | 4005 | 12,09 | 3655  | 3378  | 3346  | 2680  | 47386  | 3,28  | 0,27 |
| <i>g48</i> | <i>g48_atg</i>     | <u>CCAAGCTTGCATGCCTGCAGCGCGCCGCTTGACCTCATGCAGTAAAAAG</u>    | 241  | 182  |      |       | 16372 | 14621 | 14149 | 11134 |        |       |      |
|            | <i>g48_atgrev</i>  | <u>CTTTTTACTGCATGAGGTCAAGCGCCGCTGCAGGCATGCAAGCTTGG</u>      | 6    | 3    |      |       | 14949 | 13359 | 12842 | 9941  |        |       |      |
|            | <i>g48_stop</i>    | <u>AGTGAAGGGGCCAATTAAACCATGGAGCTAGCTCTAGAGGATCCC</u>        | 87   | 79   |      |       | 15501 | 14418 | 14516 | 11213 |        |       |      |
|            | <i>g48_stoprev</i> | <u>GGGATCCTCTAGAGCTAGCTCCATGGTTAATTGGCCCTTCACT</u>          | 282  | 247  | 1127 | 3,40  | 16598 | 15055 | 15410 | 11945 | 222023 | 15,39 | 4,52 |
| <i>g50</i> | <i>g50_atg</i>     | <u>CCAAGCTTGCATGCCTGCAGCGCGCCGCATGATTGAATCTACACGCAC</u>     | 244  | 162  |      |       | 5148  | 4293  | 3726  | 2957  |        |       |      |
|            | <i>g50_atgrev</i>  | <u>GTGCGGTAGATTCAATCATGCGGCCGCTGCAGGCATGCAAGCTTGG</u>       | 5    | 3    |      |       | 4566  | 3610  | 2966  | 2280  |        |       |      |
|            | <i>g50_stop</i>    | <u>AAAAGAAAGAAAGCGCTAAACCATGGAGCTAGCTCTAGAGGATCCC</u>       | 40   | 41   |      |       | 4639  | 3793  | 3206  | 2737  |        |       |      |
|            | <i>g50_stoprev</i> | <u>GGGATCCTCTAGAGCTAGCTCCATGGTTAGCGCTTCTCTTCTTT</u>         | 233  | 155  | 883  | 2,67  | 4692  | 3994  | 3447  | 2807  | 58861  | 4,08  | 1,53 |
| <i>g51</i> | <i>g51_atg</i>     | <u>CCAAGCTTGCATGCCTGCAGCGCGCCGCATGAGAAAGTTTACCCTGGA</u>     | 50   | 42   |      |       | 5333  | 4457  | 4895  | 3957  |        |       |      |
|            | <i>g51_atgrev</i>  | <u>TCCAGGGTAACTTTTCTCATGCGGCCGCTGCAGGCATGCAAGCTTGG</u>      | 4    | 4    |      |       | 6204  | 5176  | 5605  | 4309  |        |       |      |
|            | <i>g51_stop</i>    | <u>ACTTGGCTAAGAAATATGATTGACCATGGAGCTAGCTCTAGAGGATCCC</u>    | 27   | 9    |      |       | 5561  | 4843  | 5635  | 4481  |        |       |      |
|            | <i>g51_stoprev</i> | <u>GGGATCCTCTAGAGCTAGCTCCATGGTCAATCATATTTCTTAGCCAAGT</u>    | 85   | 80   | 301  | 0,91  | 5020  | 4254  | 4697  | 3650  | 78077  | 5,41  | 5,96 |
| <i>g52</i> | <i>g52_atg</i>     | <u>CCAAGCTTGCATGCCTGCAGCGCGCCGCTGTCTAATATAGGTTTAGAGTACC</u> | 562  | 502  |      |       | 4254  | 3525  | 3656  | 2843  |        |       |      |
|            | <i>g52_atgrev</i>  | <u>GGTACTCTAAACCTATATTAGACACGCGGCCGCTGCAGGCATGCAAGCTTGG</u> | 6    | 19   |      |       | 3384  | 2739  | 3070  | 2244  |        |       |      |
|            | <i>g52_stop</i>    | <u>CGAGGAAGAATGCAAAATGACCATGGAGCTAGCTCTAGAGGATCCC</u>       | 35   | 40   |      |       | 4448  | 3531  | 3906  | 3292  |        |       |      |
|            | <i>g52_stoprev</i> | <u>GGGATCCTCTAGAGCTAGCTCCATGGTCATTTGCACTTCTCTCTCG</u>       | 606  | 465  | 2235 | 6,75  | 4127  | 3439  | 3598  | 2899  | 54955  | 3,81  | 0,56 |
| <i>g64</i> | <i>g64_atg</i>     | <u>CCAAGCTTGCATGCCTGCAGCGCGCCGCATGTTTGTGCCGATTCCG</u>       | 837  | 497  |      |       | 2055  | 2072  | 1918  | 1371  |        |       |      |
|            | <i>g64_atgrev</i>  | <u>CGGAATCGGCACAAACATGCGGCCGCTGCAGGCATGCAAGCTTGG</u>        | 9    | 4    |      |       | 1933  | 1847  | 1814  | 1396  |        |       |      |
|            | <i>g64_stop</i>    | <u>CGCTGAAGAAGCGAATTGACCATGGAGCTAGCTCTAGAGGATCCC</u>        | 30   | 17   |      |       | 2068  | 2012  | 1976  | 1520  |        |       |      |
|            | <i>g64_stoprev</i> | <u>GGGATCCTCTAGAGCTAGCTCCATGGTCAATTCGCTTCTTCACGG</u>        | 746  | 479  | 2619 | 7,91  | 2320  | 1994  | 2049  | 1575  | 29920  | 2,07  | 0,26 |
| <i>g65</i> | <i>g65_atg</i>     | <u>CCAAGCTTGCATGCCTGCAGCGCGCCGCATGCAGAACCTTTGGGATA</u>      | 533  | 444  |      |       | 5013  | 4535  | 5843  | 4669  |        |       |      |
|            | <i>g65_atgrev</i>  | <u>TATCCCAAAGGTTCTGCATGCGGCCGCTGCAGGCATGCAAGCTTGG</u>       | 0    | 3    |      |       | 4243  | 3836  | 5056  | 3961  |        |       |      |
|            | <i>g65_stop</i>    | <u>CCGGCTACACAAGCTGACCATGGAGCTAGCTCTAGAGGATCCC</u>          | 27   | 30   |      |       | 4708  | 4347  | 5995  | 4460  |        |       |      |
|            | <i>g65_stoprev</i> | <u>GGGATCCTCTAGAGCTAGCTCCATGGTCAGCTTGTGTAGCCGG</u>          | 380  | 369  | 1786 | 5,39  | 5268  | 4669  | 6475  | 4800  | 77878  | 5,40  | 1,00 |
| <i>g68</i> | <i>g68_atg</i>     | <u>CCAAGCTTGCATGCCTGCAGCGCGCCGCATGTATACGTTCAATCAAAA</u>     | 293  | 205  |      |       | 1348  | 1086  | 846   | 678   |        |       |      |
|            | <i>g68_atgrev</i>  | <u>TTTGAATTGATTGAACGTATACATGCGGCCGCTGCAGGCATGCAAGCTTGG</u>  | 8    | 7    |      |       | 1157  | 1034  | 757   | 553   |        |       |      |
|            | <i>g68_stop</i>    | <u>GATGTTAACAGAGGGGTATTAACCATGGAGCTAGCTCTAGAGGATCCC</u>     | 42   | 42   |      |       | 1313  | 1020  | 936   | 678   |        |       |      |
|            | <i>g68_stoprev</i> | <u>GGGATCCTCTAGAGCTAGCTCCATGGTTAATACCCCTCTGTTAACATC</u>     | 336  | 229  | 1162 | 1,31  | 1305  | 1039  | 848   | 732   | 15330  | 1,06  | 0,81 |
| <i>g69</i> | <i>g69_atg</i>     | <u>CCAAGCTTGCATGCCTGCAGCGCGCCGCATGGAAGCCACCAAGTCT</u>       | 965  | 556  |      |       | 6676  | 5661  | 5057  | 4117  |        |       |      |

|               |                    |                                                            |              |     |      |       |                |      |      |      |       |      |      |
|---------------|--------------------|------------------------------------------------------------|--------------|-----|------|-------|----------------|------|------|------|-------|------|------|
|               | <i>g69_atgrev</i>  | <u>AGACTTGGTGGCTTCCATGCGGCCGCTGCAGGCATGCAAGCTTGG</u>       | 3            | 2   |      |       | 6311           | 5534 | 4816 | 3859 |       |      |      |
|               | <i>g69_stop</i>    | <u>GTGTACCATTGAAGTGTATAAATAACCATGGAGCTAGCTCTAGAGGATCCC</u> | 19           | 11  |      |       | 5559           | 4802 | 4518 | 3431 |       |      |      |
|               | <i>g69_stoprev</i> | <u>GGGATCCTCTAGAGCTAGCTCCATGGTTATTATACACTTCAATGGTACAC</u>  | 687          | 467 | 2710 | 8,18  | 6244           | 5494 | 5048 | 4024 | 81151 | 5,62 | 0,69 |
| <i>g76</i>    | <i>g76_atg</i>     | <u>AGCTTGCATGCCTGCAGGCGGCCGCATGAAACATCAGGGC</u>            | 355          | 302 |      |       | 5815           | 4711 | 4355 | 3411 |       |      |      |
|               | <i>g76_atgrev</i>  | <u>GCCCTGATGTTTCATGCGGCCGCTGCAGGCATGCAAGCT</u>             | 1            | 2   |      |       | 4961           | 4305 | 3949 | 3037 |       |      |      |
|               | <i>g76_stop</i>    | <u>CATGCACGCTGGAGATAACCATGGAGCTAGCTCTAGAGGATCCC</u>        | 40           | 26  |      |       | 4816           | 3867 | 3986 | 2842 |       |      |      |
|               | <i>g76_stoprev</i> | <u>GGGATCCTCTAGAGCTAGCTCCATGGTTATCTCCAGCGTGCATG</u>        | 353          | 226 | 1305 | 3,94  | 5026           | 4241 | 3925 | 3084 | 66331 | 4,60 | 1,17 |
| <i>g77</i>    | <i>g77_atg</i>     | <u>CCAAGCTTGCATGCCTGCAGGCGGCCGCATGAAACAATGTTGTATACAAG</u>  | 1426         | 870 |      |       | 5061           | 3957 | 5141 | 4112 |       |      |      |
|               | <i>g77_atgrev</i>  | <u>CTTGTATACAAACATTGTTTTCATGCGGCCGCTGCAGGCATGCAAGCTTGG</u> | 12           | 6   |      |       | 3902           | 3272 | 4273 | 3045 |       |      |      |
|               | <i>g77_stop</i>    | <u>GAGGTGTTAGGCCTGTGACCATGGAGCTAGCTCTAGAGGATCCC</u>        | 49           | 35  |      |       | 4599           | 3988 | 5007 | 4006 |       |      |      |
|               | <i>g77_stoprev</i> | <u>GGGATCCTCTAGAGCTAGCTCCATGGTCACAGGCCTAACACCTC</u>        | 709          | 681 | 3788 | 11,44 | 4720           | 4073 | 5396 | 4310 | 68862 | 4,77 | 0,42 |
| <b>Totals</b> |                    |                                                            | <b>33124</b> |     |      |       | <b>1442813</b> |      |      |      |       |      |      |

*NGS experiment 2*

|            |                    |                                                              |     |     |      |       |       |       |       |       |        |       |      |
|------------|--------------------|--------------------------------------------------------------|-----|-----|------|-------|-------|-------|-------|-------|--------|-------|------|
| <i>g18</i> | <i>g18_atg</i>     | <u>CCAAGCTTGCATGCCTGCAGGCGGCCGCATGGCACGAAAACCACAA</u>        | 594 | 568 |      |       | 32026 | 25686 | 27758 | 26039 |        |       |      |
|            | <i>g18_atgrev</i>  | <u>TTGTGGTTTTCGTGCCATGCGGCCGCTGCAGGCATGCAAGCTTGG</u>         | 4   | 0   |      |       | 24355 | 19722 | 20933 | 19404 |        |       |      |
|            | <i>g18_stop</i>    | <u>GGACGAGGATAATAATGAATCTTGACCATGGAGCTAGCTCTAGAGGATCCC</u>   | 16  | 4   |      |       | 23707 | 18651 | 20102 | 18915 |        |       |      |
|            | <i>g18_stoprev</i> | <u>GGGATCCTCTAGAGCTAGCTCCATGGTCAAGATTCAATTATTATCTCGTCC</u>   | 415 | 291 | 1892 | 36,90 | 24199 | 18668 | 19867 | 19246 | 359278 | 41,23 | 1,12 |
| <i>g26</i> | <i>g26_atg</i>     | <u>CCAAGCTTGCATGCCTGCAGGCGGCCGCATGGGCTGTTGAAGATTAC</u>       | 215 | 206 |      |       | 8285  | 6530  | 7396  | 7384  |        |       |      |
|            | <i>g26_atgrev</i>  | <u>GTAATCTTCAACAGGCCCATGCGGCCGCTGCAGGCATGCAAGCTTGG</u>       | 2   | 0   |      |       | 7618  | 6473  | 7369  | 6877  |        |       |      |
|            | <i>g26_stop</i>    | <u>CCGGCTTTTACAATTACCTGACCATGGAGCTAGCTCTAGAGGATCCC</u>       | 19  | 18  |      |       | 7373  | 5499  | 6399  | 5986  |        |       |      |
|            | <i>g26_stoprev</i> | <u>GGGATCCTCTAGAGCTAGCTCCATGGTCAGGTAATTGTAAAGCCGG</u>        | 295 | 231 | 986  | 19,23 | 7943  | 6355  | 7247  | 6830  | 111564 | 12,80 | 0,67 |
| <i>g40</i> | <i>g40_atg</i>     | <u>CCAAGCTTGCATGCCTGCAGGCGGCCGCATGAGAACCAGACGACTTGA</u>      | 99  | 58  |      |       | 2351  | 2162  | 2007  | 1861  |        |       |      |
|            | <i>g40_atgrev</i>  | <u>TCAAGTCGCTGGTTCTCATGCGGCCGCTGCAGGCATGCAAGCTTGG</u>        | 1   | 2   |      |       | 1804  | 1743  | 1680  | 1500  |        |       |      |
|            | <i>g40_stop</i>    | <u>GACACTGTTGCGGGTAGCCATGGAGCTAGCTCTAGAGGATCCC</u>           | 10  | 18  |      |       | 2413  | 1935  | 1954  | 1679  |        |       |      |
|            | <i>g40_stoprev</i> | <u>GGGATCCTCTAGAGCTAGCTCCATGGCTACCCCGCAACAGTGTC</u>          | 258 | 142 | 588  | 11,47 | 2582  | 2104  | 2045  | 1833  | 31653  | 3,63  | 0,32 |
| <i>g58</i> | <i>g58_atg</i>     | <u>CCAAGCTTGCATGCCTGCAGGCGGCCGCTTGATATTTCATGCTTCGCTC</u>     | 0   | 0   |      |       | 190   | 96    | 141   | 104   |        |       |      |
|            | <i>g58_atgrev</i>  | <u>GAGCGAAGCATGAATATCCAAGCGGCCGCTGCAGGCATGCAAGCTTGG</u>      | 0   | 0   |      |       | 188   | 125   | 171   | 121   |        |       |      |
|            | <i>g58_stop</i>    | <u>AACAAGGATGGTTGTCATGACCATGGAGCTAGCTCTAGAGGATCCC</u>        | 7   | 10  |      |       | 268   | 172   | 240   | 252   |        |       |      |
|            | <i>g58_stoprev</i> | <u>GGGATCCTCTAGAGCTAGCTCCATGGTCATGCAACACCATCTCTGTT</u>       | 23  | 9   | 49   | 0,96  | 249   | 153   | 190   | 191   | 2851   | 0,33  | 0,34 |
| <i>g59</i> | <i>g59_atg</i>     | <u>CCAAGCTTGCATGCCTGCAGGCGGCCGCTTGAATGTAGCATTAAGTGTGGC</u>   | 6   | 4   |      |       | 11217 | 8583  | 9104  | 8817  |        |       |      |
|            | <i>g59_atgrev</i>  | <u>GCCACACTTAATGCTACATTCAAGCGGCCGCTGCAGGCATGCAAGCTTGG</u>    | 0   | 0   |      |       | 10005 | 8543  | 8755  | 8422  |        |       |      |
|            | <i>g59_stop</i>    | <u>GTTTCGAGTCTGCTCGCTGACCATGGAGCTAGCTCTAGAGGATCCC</u>        | 13  | 10  |      |       | 11608 | 8909  | 9883  | 9073  |        |       |      |
|            | <i>g59_stoprev</i> | <u>GGGATCCTCTAGAGCTAGCTCCATGGTCAGCGAGCAGACTCGAAC</u>         | 33  | 55  | 121  | 2,36  | 11051 | 8558  | 9485  | 8459  | 150472 | 17,27 | 7,32 |
| <i>g61</i> | <i>g61_atg</i>     | <u>CCAAGCTTGCATGCCTGCAGGCGGCCGCTTGGGCAACCAGAGACAG</u>        | 30  | 29  |      |       | 7293  | 6429  | 4773  | 4955  |        |       |      |
|            | <i>g61_atgrev</i>  | <u>CTGTTCTCGGTTGCCAAGCGGCCGCTGCAGGCATGCAAGCTTGG</u>          | 0   | 0   |      |       | 6223  | 5908  | 4512  | 4592  |        |       |      |
|            | <i>g61_stop</i>    | <u>CTTTTGACTATAAAGTGCCTTTTATAGCCATGGAGCTAGCTCTAGAGGATCCC</u> | 10  | 1   |      |       | 5433  | 4700  | 3700  | 3641  |        |       |      |
|            | <i>g61_stoprev</i> | <u>GGGATCCTCTAGAGCTAGCTCCATGGCTAAAAGGCACCTTATAGTCAAAAG</u>   | 44  | 25  | 139  | 2,71  | 6233  | 5290  | 4055  | 4224  | 81961  | 9,41  | 3,47 |
| <i>g71</i> | <i>g71_atg</i>     | <u>CCAAGCTTGCATGCCTGCAGGCGGCCGCATGAGTGAGAACTTCGAGAAG</u>     | 124 | 125 |      |       | 6723  | 5962  | 5272  | 5492  |        |       |      |
|            | <i>g71_atgrev</i>  | <u>CTTCTCGAAGTTCTCACTCATGCGGCCGCTGCAGGCATGCAAGCTTGG</u>      | 0   | 1   |      |       | 6472  | 6138  | 5315  | 5338  |        |       |      |
|            | <i>g71_stop</i>    | <u>TGCGAAGGGGCACTAAAATAACCATGGAGCTAGCTCTAGAGGATCCC</u>       | 19  | 13  |      |       | 6720  | 5587  | 4838  | 5011  |        |       |      |
|            | <i>g71_stoprev</i> | <u>GGGATCCTCTAGAGCTAGCTCCATGGTTATTTTTAGTGCCCTTGCA</u>        | 182 | 130 | 594  | 11,59 | 6759  | 6080  | 5171  | 5267  | 92145  | 10,57 | 0,91 |
| <i>g72</i> | <i>g72_atg</i>     | <u>CCAAGCTTGCATGCCTGCAGGCGGCCGCATGAAAGCGGTCAACAAGAA</u>      | 17  | 25  |      |       | 1487  | 1452  | 1262  | 1081  |        |       |      |
|            | <i>g72_atgrev</i>  | <u>TTCTTGTGTACCGCTTTTCATGCGGCCGCTGCAGGCATGCAAGCTTGG</u>      | 0   | 2   |      |       | 1321  | 1267  | 1109  | 977   |        |       |      |
|            | <i>g72_stop</i>    | <u>GTACAGGTGAACCTGCCATGACCATGGAGCTAGCTCTAGAGGATCCC</u>       | 11  | 11  |      |       | 1585  | 1617  | 1191  | 1126  |        |       |      |
|            | <i>g72_stoprev</i> | <u>GGGATCCTCTAGAGCTAGCTCCATGGTCATGCGAGTTCTACCTGTAC</u>       | 85  | 58  | 209  | 4,08  | 1620  | 1506  | 1320  | 1212  | 21133  | 2,43  | 0,59 |
| <i>g73</i> | <i>g73_atg</i>     | <u>CCAAGCTTGCATGCCTGCAGGCGGCCGCATGGCGACGAGTAAAAACG</u>       | 51  | 42  |      |       | 1686  | 1305  | 1175  | 1238  |        |       |      |
|            | <i>g73_atgrev</i>  | <u>CGTTTTTACTCGTCGCCATGCGGCCGCTGCAGGCATGCAAGCTTGG</u>        | 0   | 0   |      |       | 1444  | 1190  | 1097  | 1058  |        |       |      |

|                    |                                                    |     |             |     |       |      |      |      |      |               |      |      |
|--------------------|----------------------------------------------------|-----|-------------|-----|-------|------|------|------|------|---------------|------|------|
| <i>g73_stop</i>    | CAAGAAGTACAGTCAGGAAGATAACCATGGAGCTAGCTCTAGAGGATCCC | 22  | 17          |     |       | 1464 | 1224 | 1145 | 1083 |               |      |      |
| <i>g73_stoprev</i> | GGGATCCTCTAGAGCTAGCTCCATGGTTATCTTCCTGACTGTACTTCTTG | 268 | 149         | 549 | 10,71 | 1612 | 1294 | 1187 | 1196 | 20398         | 2,34 | 0,22 |
| <b>Totals</b>      |                                                    |     | <b>5127</b> |     |       |      |      |      |      | <b>871455</b> |      |      |

References

1. Mohanraj, U.; Wan, X.; Spruit, C.M.; Skurnik, M.; Pajunen, M.I. A toxicity screening approach to identify bacteriophage-encoded anti-microbial proteins. *Viruses* **2019**, *11*.

2. Zimmermann, L.; Stephens, A.; Nam, S.Z.; Rau, D.; Kubler, J.; Lozajic, M.; Gabler, F.; Soding, J.; Lupas, A.N.; Alva, V. A Completely Reimplemented MPI Bioinformatics Toolkit with a New HHpred Server at its Core. *J Mol Biol* **2018**, *430*, 2237-2243.
